# Supplementary material for: Molecular dynamics simulation of synergistic behavior at the air–water interface: mixed cationic–anionic fluorocarbon–hydrocarbon surfactants
Source: Royal Society of Chemistry journal article supplement (doi:10.1039/d4cp04417g), 2025-01-01
Supplement: d4cp04417g1.pdf [file d4cp04417g1.pdf]

## 16 model of the system

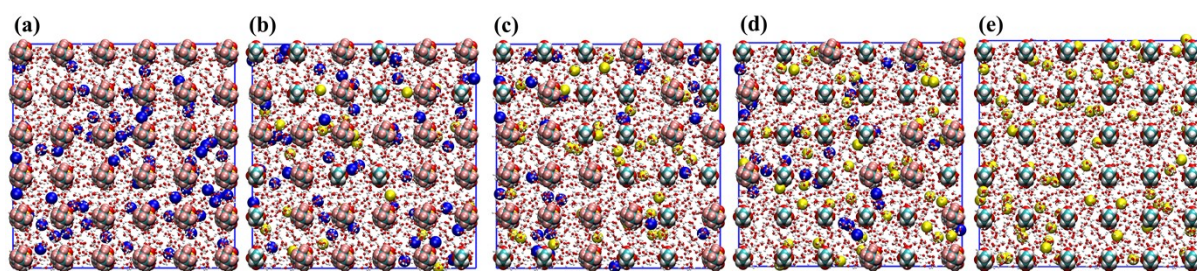

17

18 **Figure. S1** The top view initial model of the system (a) PFB-MC/1-OA = 1:0 (b) PFB-MC/1-

19 OA = 2:1 (c) PFB-MC/1-OA = 1:1 (d) PFB-MC/1-OA = 1:2 (e) PFB-MC/1-OA = 0:1

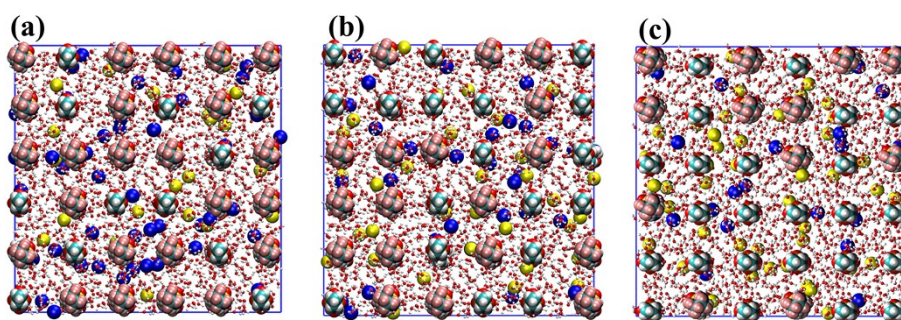

20

21 **Figure. S2** The top view initial model of the recreate system (a) PFB-MC/1-OA = 2:1 (b) PFB-

22 MC/1-OA = 1:1 (c) PFB-MC/1-OA = 1:2

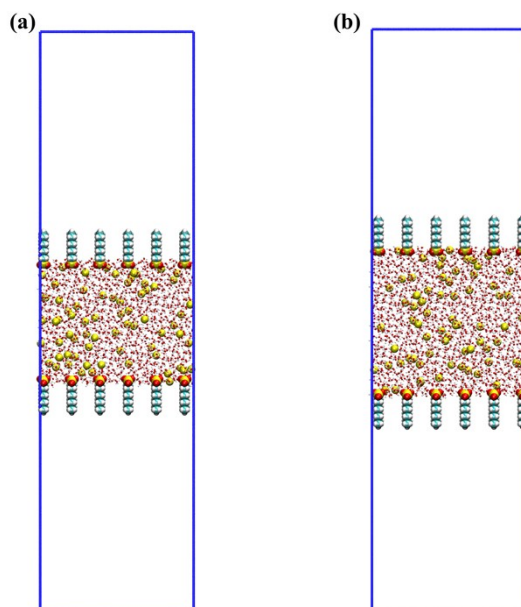

23

24 **Figure S3.** The initial models of the system with water layer thicknesses of 4 nm (a) and 5 nm

25 (b) for PFB-MC/1-OA ratios of 0:1.

26 1D-Density

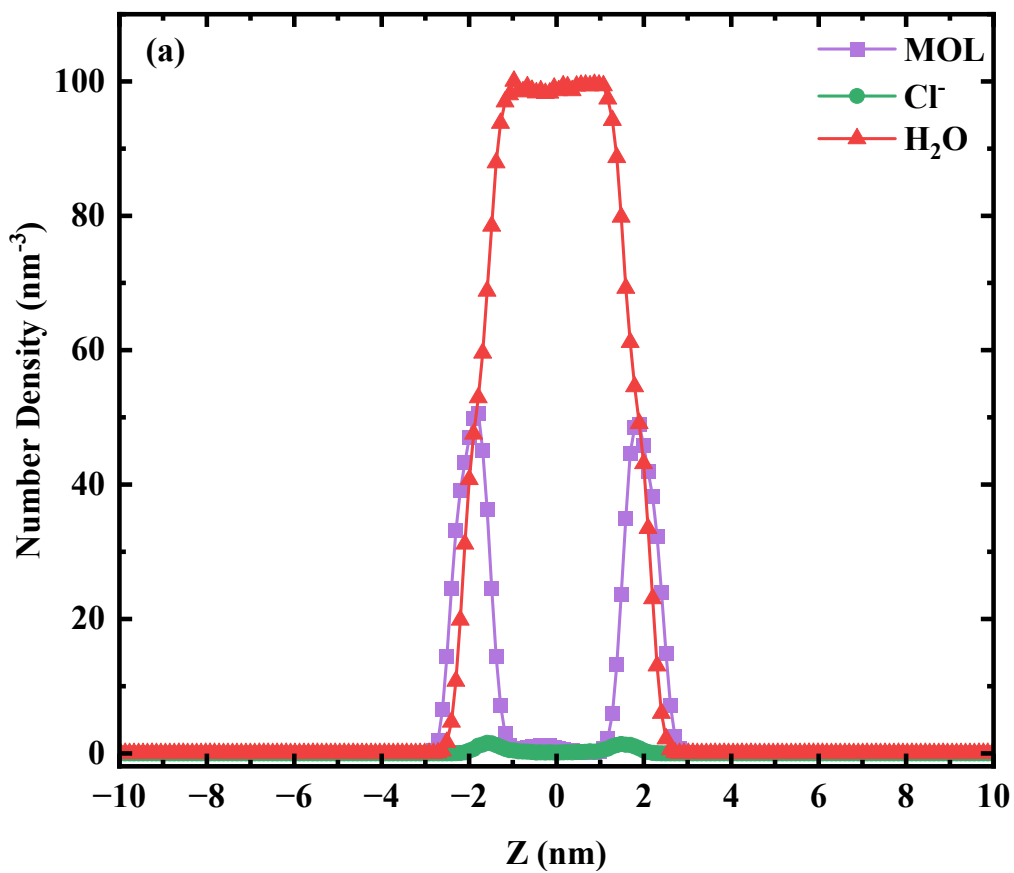

27

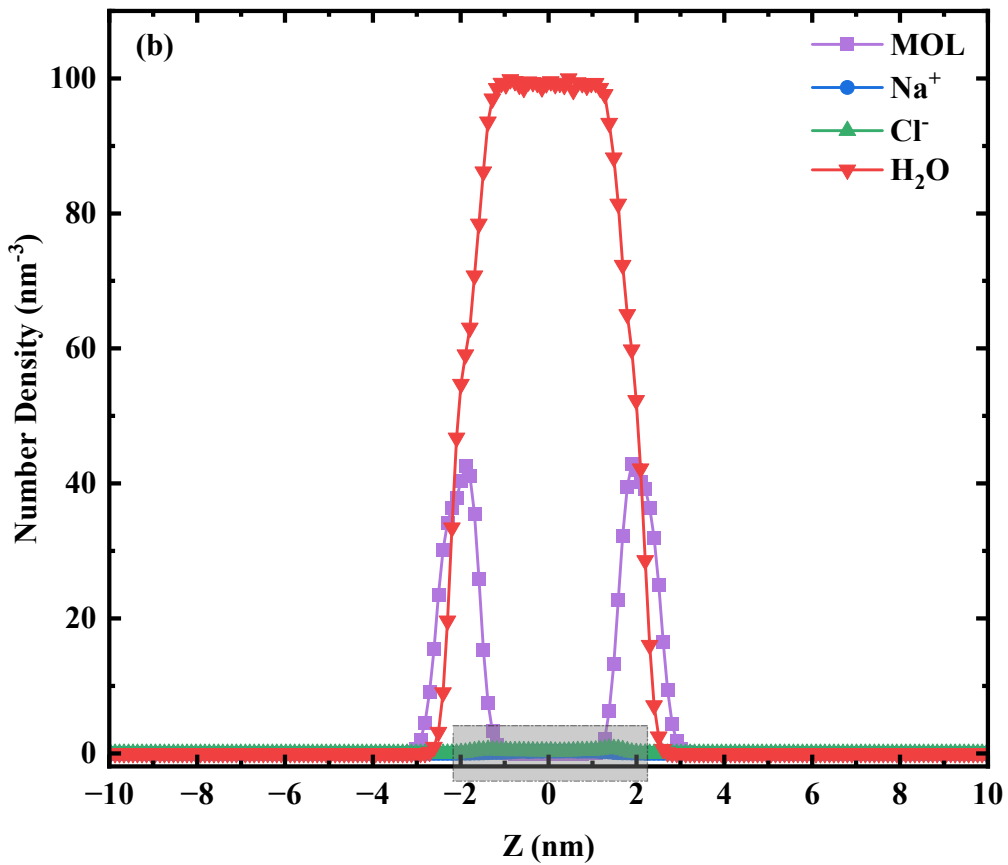

28

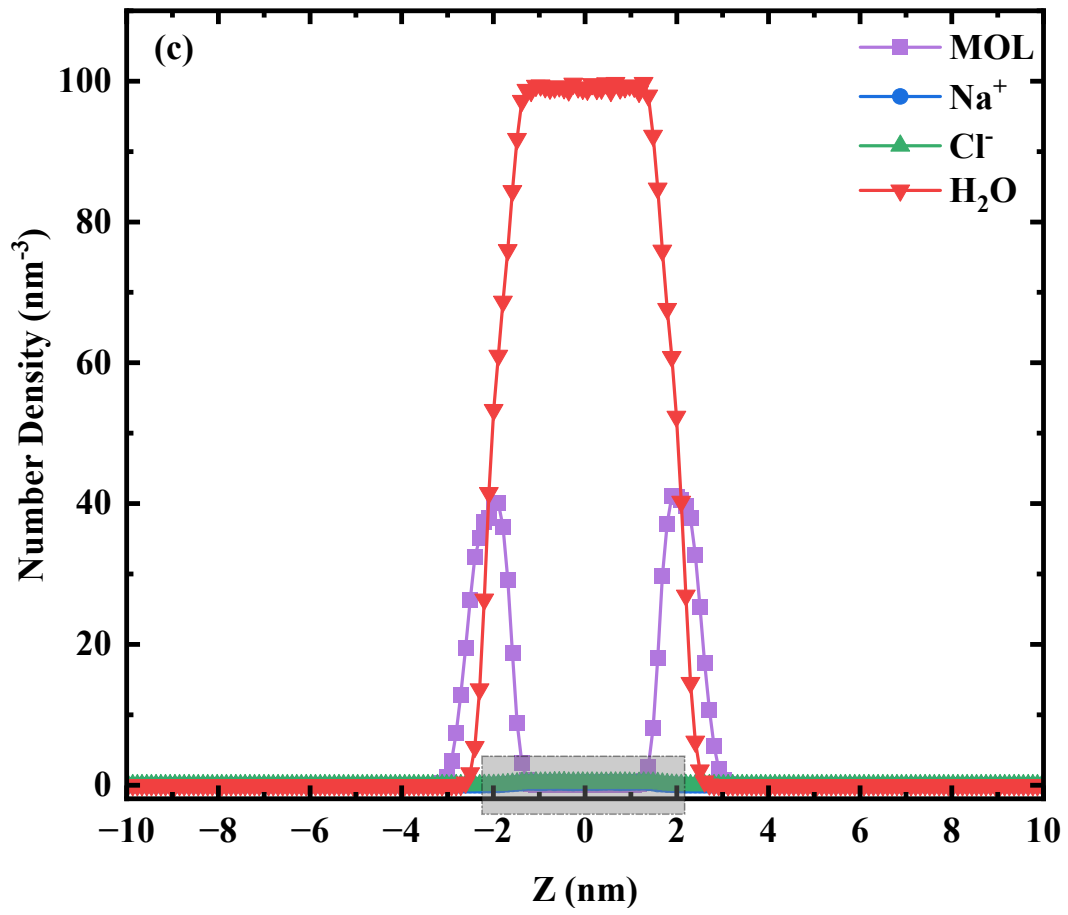

29

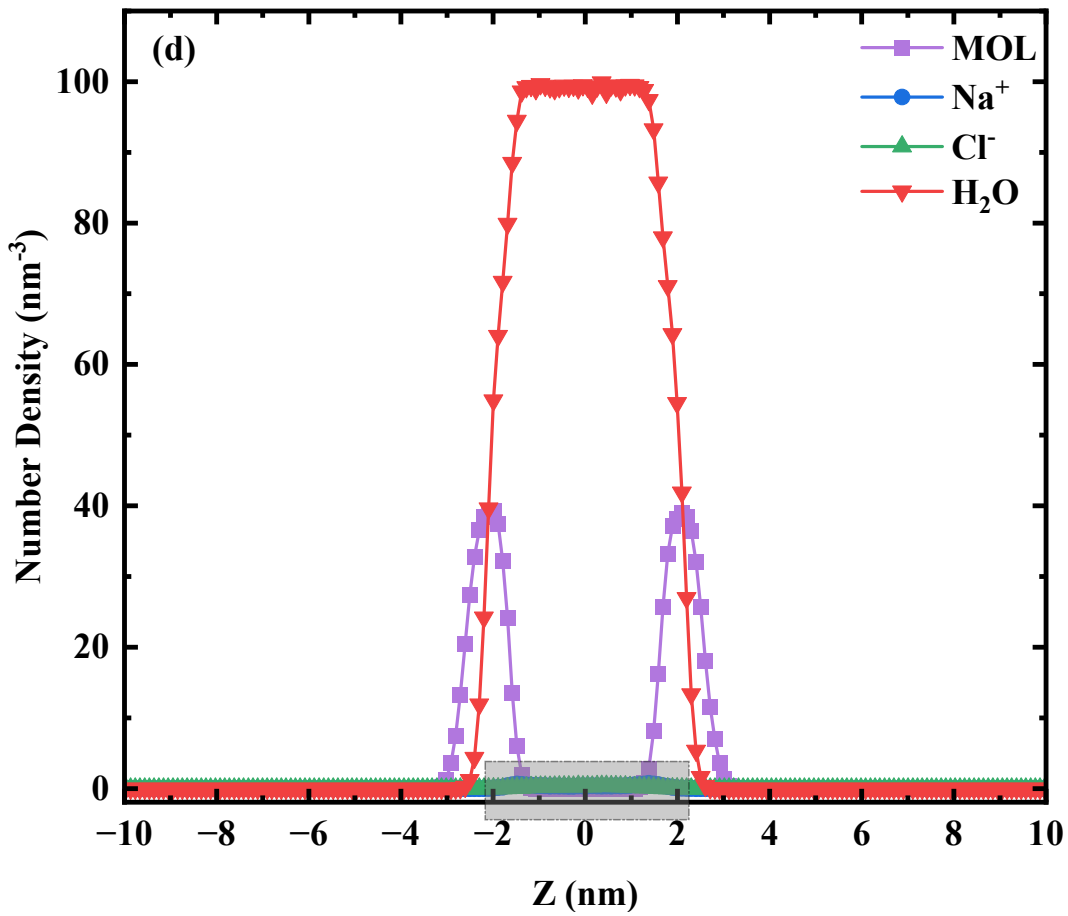

30

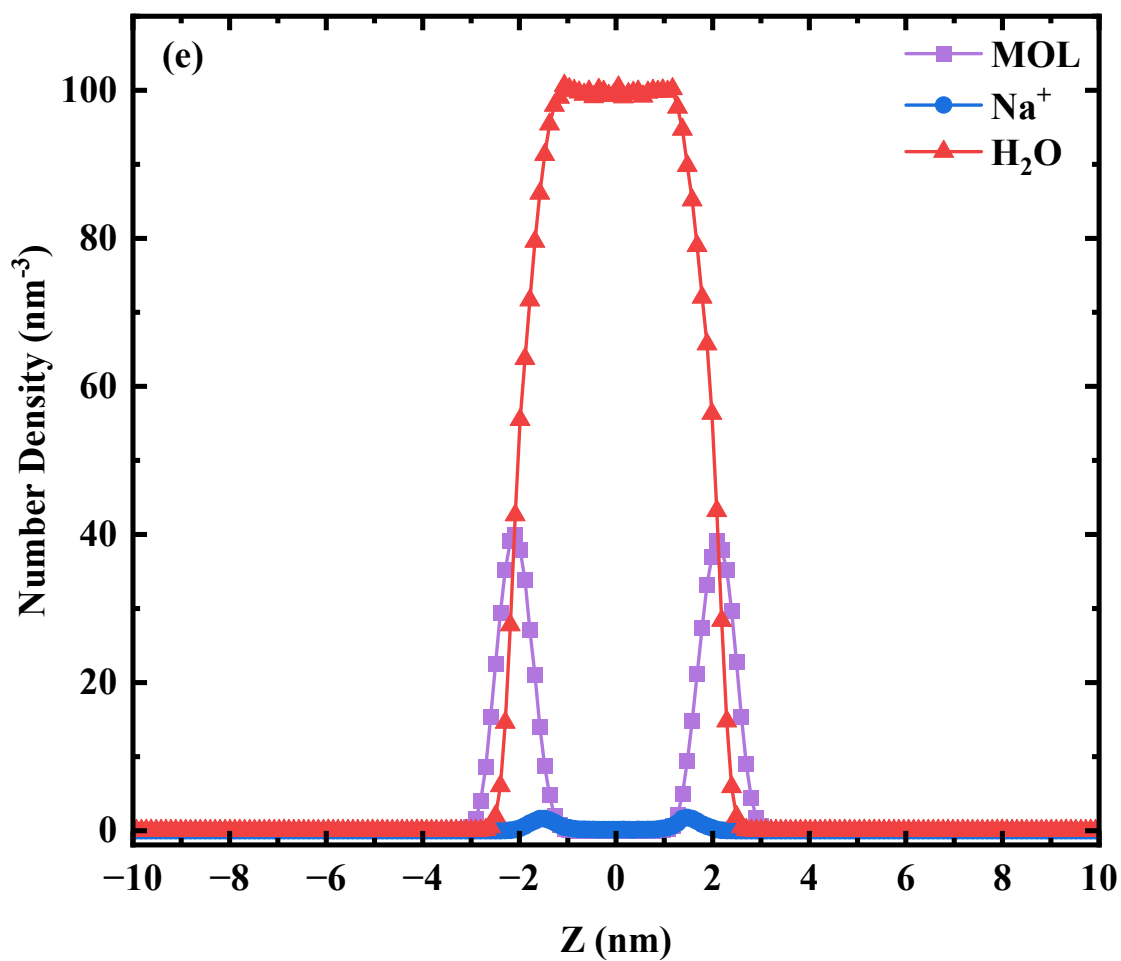

31

32 **Figure S4.** Z-axis distribution of number densities (a) PFB-MC/1-OA = 1:0 (b) PFB-MC/1-

33 OA = 2:1 (c) PFB-MC/1-OA = 1:1 (d) PFB-MC/1-OA = 1:2 (e) PFB-MC/1-OA = 0:1.

34

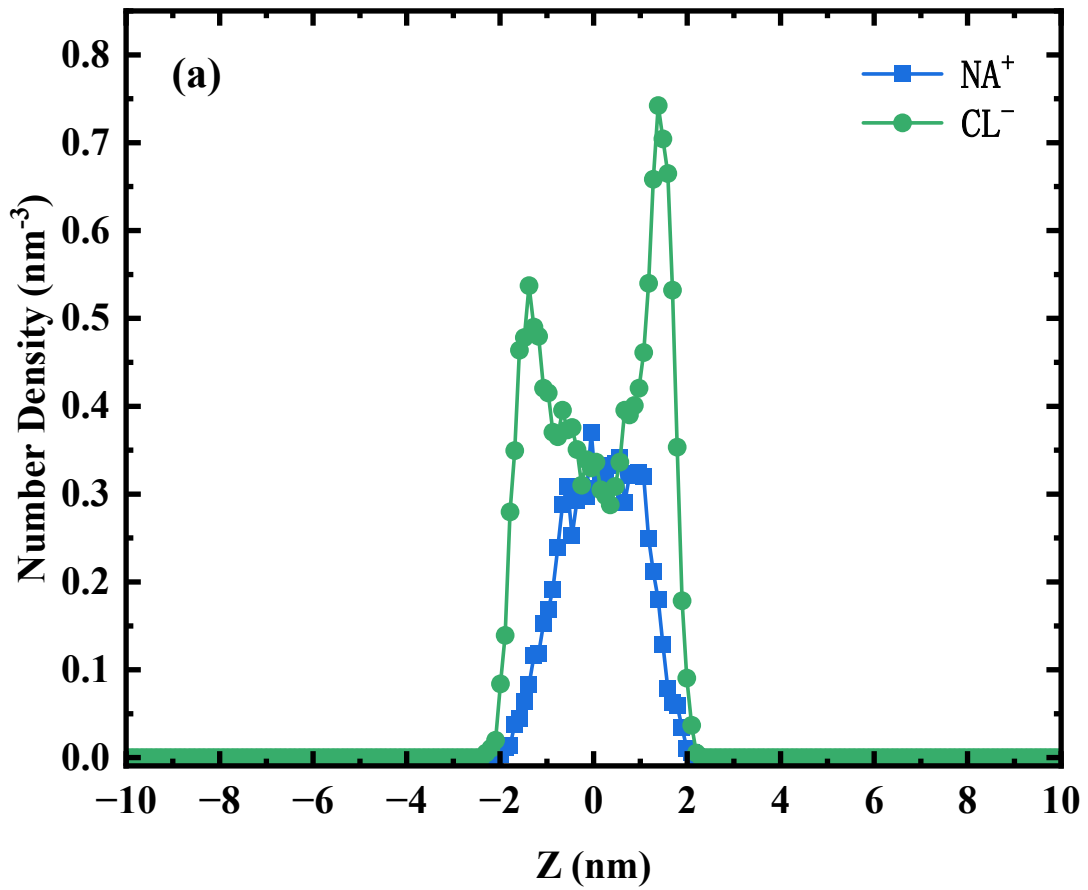

35

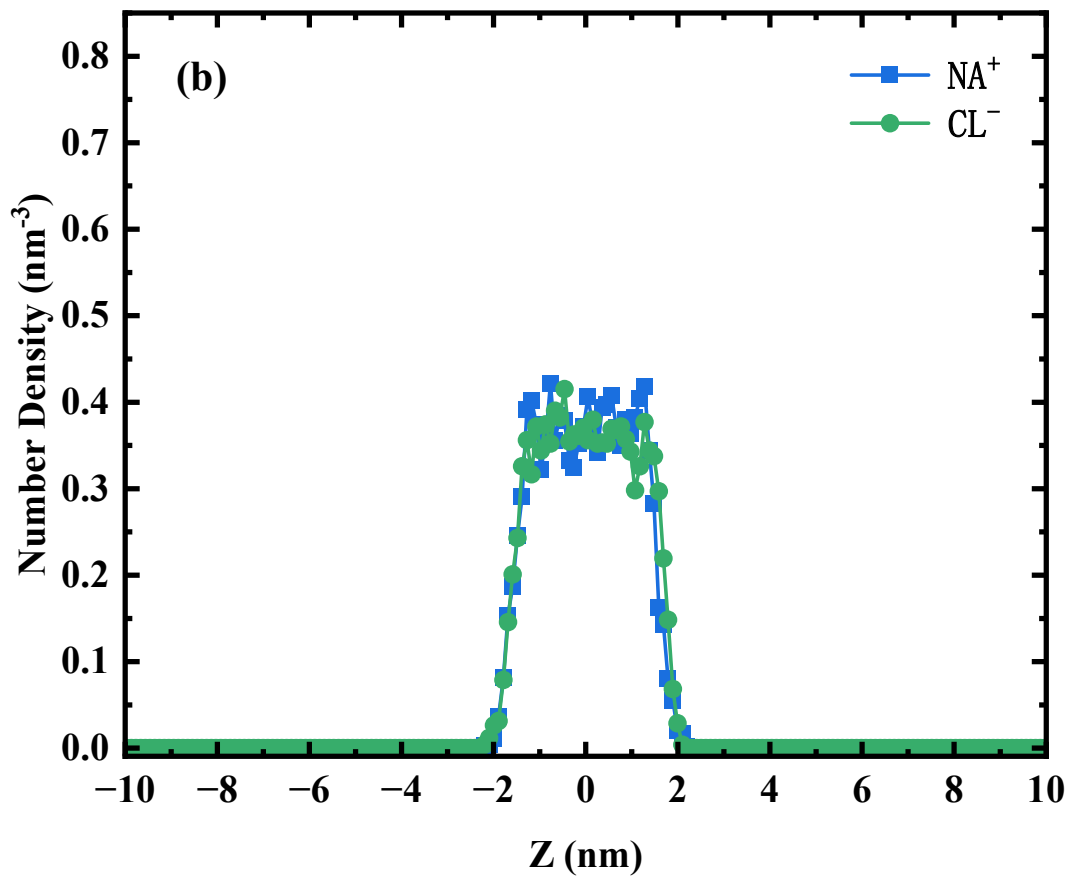

36

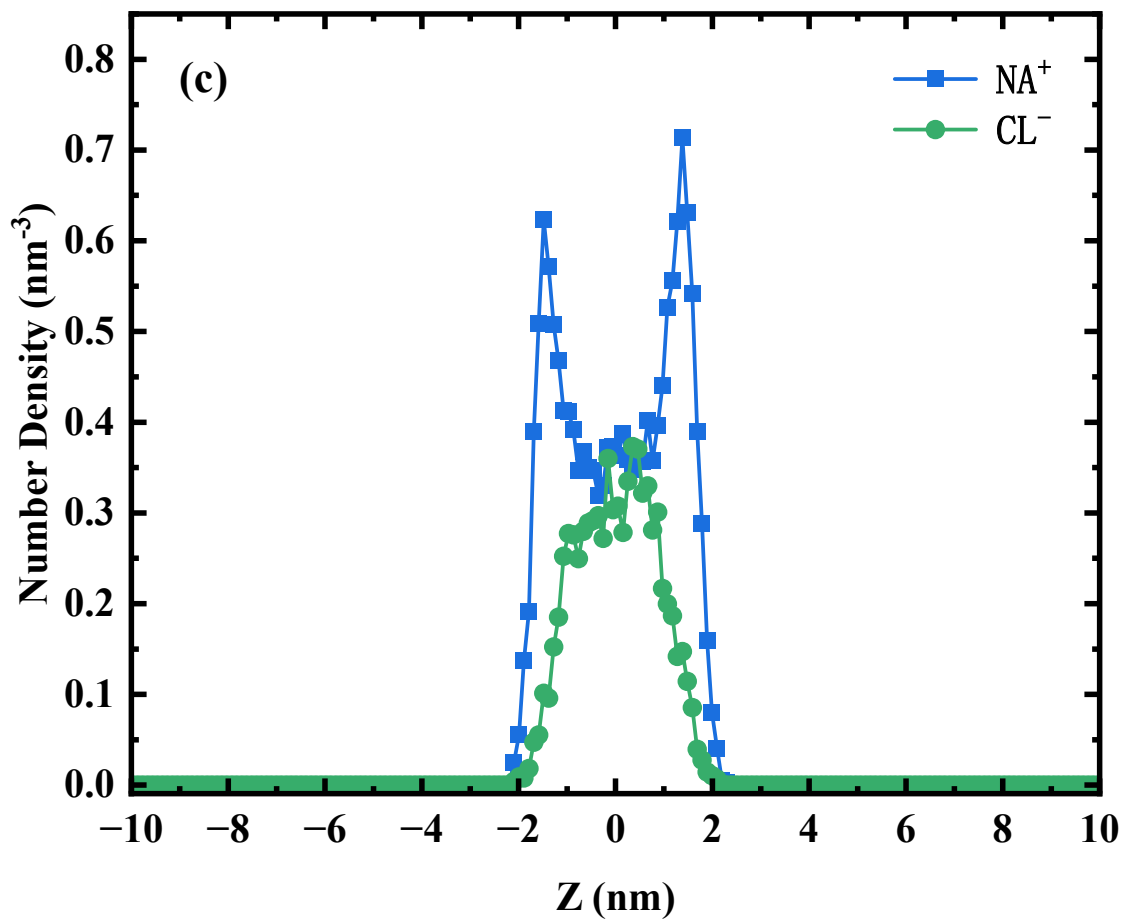

37

38 **Figure S5** Z-axis distribution of number densities in mixed system (a) PFB-MC/1-OA = 2:1

39 (b) PFB-MC/1-OA = 1:1 (c) PFB-MC/1-OA = 1:2.

40

---

## 41 Detailed parameters of topology files

### 42 PFB-MC.itp

43 [ moleculetype ]

44 ; name nrexcl

45 PFB-MC 3

46

47 [ atoms ]

48 ; Index type residue resname atom cgnr charge mass

49 1 c3 1 MOL C1 1 0.38630423

50 12.010736

51 2 c3 1 MOL C2 2 0.14363258

52 12.010736

53 3 c3 1 MOL C3 3 0.22102457

54 12.010736

55 4 c3 1 MOL C4 4 0.03733211

56 12.010736

57 5 f 1 MOL F5 5 -0.09365470

58 18.998403

59 6 f 1 MOL F6 6 -0.10629787

60 18.998403

61 7 f 1 MOL F7 7 -0.11494802



---

|    |           |    |   |     |     |    |             |  |
|----|-----------|----|---|-----|-----|----|-------------|--|
| 62 | 18.998403 |    |   |     |     |    |             |  |
| 63 | 8         | f  | 1 | MOL | F8  | 8  | -0.07239060 |  |
| 64 | 18.998403 |    |   |     |     |    |             |  |
| 65 | 9         | f  | 1 | MOL | F9  | 9  | -0.07893600 |  |
| 66 | 18.998403 |    |   |     |     |    |             |  |
| 67 | 10        | f  | 1 | MOL | F10 | 10 | -0.09993404 |  |
| 68 | 18.998403 |    |   |     |     |    |             |  |
| 69 | 11        | f  | 1 | MOL | F11 | 11 | -0.13825585 |  |
| 70 | 18.998403 |    |   |     |     |    |             |  |
| 71 | 12        | f  | 1 | MOL | F12 | 12 | -0.03612519 |  |
| 72 | 18.998403 |    |   |     |     |    |             |  |
| 73 | 13        | f  | 1 | MOL | F13 | 13 | -0.06555029 |  |
| 74 | 18.998403 |    |   |     |     |    |             |  |
| 75 | 14        | s6 | 1 | MOL | S14 | 14 | 0.87168130  |  |
| 76 | 32.064787 |    |   |     |     |    |             |  |
| 77 | 15        | o  | 1 | MOL | O15 | 15 | -0.43763937 |  |
| 78 | 15.999405 |    |   |     |     |    |             |  |
| 79 | 16        | o  | 1 | MOL | O16 | 16 | -0.38098913 |  |
| 80 | 15.999405 |    |   |     |     |    |             |  |
| 81 | 17        | n3 | 1 | MOL | N17 | 17 | -0.65996229 |  |
| 82 | 14.006703 |    |   |     |     |    |             |  |
| 83 | 18        | hn | 1 | MOL | H18 | 18 | 0.39307088  |  |

---

|     |           |    |   |     |     |    |             |
|-----|-----------|----|---|-----|-----|----|-------------|
| 84  | 1.007941  |    |   |     |     |    |             |
| 85  | 19        | c3 | 1 | MOL | C19 | 19 | 0.31636510  |
| 86  | 12.010736 |    |   |     |     |    |             |
| 87  | 20        | c3 | 1 | MOL | C20 | 20 | -0.09011922 |
| 88  | 12.010736 |    |   |     |     |    |             |
| 89  | 21        | h1 | 1 | MOL | H21 | 21 | 0.01770142  |
| 90  | 1.007941  |    |   |     |     |    |             |
| 91  | 22        | h1 | 1 | MOL | H22 | 22 | 0.01770142  |
| 92  | 1.007941  |    |   |     |     |    |             |
| 93  | 23        | c3 | 1 | MOL | C23 | 23 | -0.24981353 |
| 94  | 12.010736 |    |   |     |     |    |             |
| 95  | 24        | hc | 1 | MOL | H24 | 24 | 0.08737701  |
| 96  | 1.007941  |    |   |     |     |    |             |
| 97  | 25        | hc | 1 | MOL | H25 | 25 | 0.08737701  |
| 98  | 1.007941  |    |   |     |     |    |             |
| 99  | 26        | hx | 1 | MOL | H26 | 26 | 0.16215708  |
| 100 | 1.007941  |    |   |     |     |    |             |
| 101 | 27        | hx | 1 | MOL | H27 | 27 | 0.16215708  |
| 102 | 1.007941  |    |   |     |     |    |             |
| 103 | 28        | hn | 1 | MOL | H28 | 28 | 0.35002768  |
| 104 | 1.007941  |    |   |     |     |    |             |
| 105 | 29        | n4 | 1 | MOL | N29 | 29 | 0.00880602  |

---

106 14.006703

107        30        c3            1        MOL        C30            30        -0.45119007

108 12.010736

109        31        hx            1        MOL        H31            31        0.21045303

110 1.007941

111        32        hx            1        MOL        H32            32        0.21045303

112 1.007941

113        33        hx            1        MOL        H33            33        0.21045303

114 1.007941

115        34        c3            1        MOL        C34            34        -0.34287118

116 12.010736

117        35        hx            1        MOL        H35            35        0.17486760

118 1.007941

119        36        hx            1        MOL        H36            36        0.17486760

120 1.007941

121        37        hx            1        MOL        H37            37        0.17486760

122 1.007941

123

124 [ bonds ]

125 ; atom\_i atom\_j functype        r0 (nm)        k (kJ/mol/nm^2)

126        1        2        1        0.155389        2.467929E+05        ; C1-C2, DRIH

127 method

---

|     |        |    |   |          |              |                |
|-----|--------|----|---|----------|--------------|----------------|
| 128 | 1      | 5  | 1 | 0.133166 | 4.071290E+05 | ; C1-F5, DRIH  |
| 129 | method |    |   |          |              |                |
| 130 | 1      | 6  | 1 | 0.133987 | 3.938268E+05 | ; C1-F6, DRIH  |
| 131 | method |    |   |          |              |                |
| 132 | 1      | 7  | 1 | 0.133815 | 3.952800E+05 | ; C1-F7, DRIH  |
| 133 | method |    |   |          |              |                |
| 134 | 2      | 3  | 1 | 0.155443 | 2.442864E+05 | ; C2-C3, DRIH  |
| 135 | method |    |   |          |              |                |
| 136 | 2      | 8  | 1 | 0.134595 | 3.972445E+05 | ; C2-F8, DRIH  |
| 137 | method |    |   |          |              |                |
| 138 | 2      | 9  | 1 | 0.135464 | 3.812073E+05 | ; C2-F9, DRIH  |
| 139 | method |    |   |          |              |                |
| 140 | 3      | 4  | 1 | 0.155337 | 2.428070E+05 | ; C3-C4, DRIH  |
| 141 | method |    |   |          |              |                |
| 142 | 3      | 10 | 1 | 0.135336 | 3.810860E+05 | ; C3-F10, DRIH |
| 143 | method |    |   |          |              |                |
| 144 | 3      | 11 | 1 | 0.136231 | 3.630831E+05 | ; C3-F11, DRIH |
| 145 | method |    |   |          |              |                |
| 146 | 4      | 12 | 1 | 0.133683 | 4.023830E+05 | ; C4-F12, DRIH |
| 147 | method |    |   |          |              |                |
| 148 | 4      | 13 | 1 | 0.135282 | 3.649358E+05 | ; C4-F13, DRIH |
| 149 | method |    |   |          |              |                |

---

|     |        |    |   |          |              |                 |
|-----|--------|----|---|----------|--------------|-----------------|
| 150 | 4      | 14 | 1 | 0.190782 | 1.432446E+05 | ; C4-S14, DRIH  |
| 151 | method |    |   |          |              |                 |
| 152 | 14     | 15 | 1 | 0.146875 | 5.495640E+05 | ; S14-O15, DRIH |
| 153 | method |    |   |          |              |                 |
| 154 | 14     | 16 | 1 | 0.144959 | 6.155814E+05 | ; S14-O16, DRIH |
| 155 | method |    |   |          |              |                 |
| 156 | 14     | 17 | 1 | 0.165882 | 2.688670E+05 | ; S14-N17, DRIH |
| 157 | method |    |   |          |              |                 |
| 158 | 17     | 18 | 1 | 0.101441 | 4.318770E+05 | ; N17-H18, DRIH |
| 159 | method |    |   |          |              |                 |
| 160 | 17     | 19 | 1 | 0.146927 | 3.129959E+05 | ; N17-C19, DRIH |
| 161 | method |    |   |          |              |                 |
| 162 | 19     | 20 | 1 | 0.154383 | 2.555698E+05 | ; C19-C20, DRIH |
| 163 | method |    |   |          |              |                 |
| 164 | 19     | 21 | 1 | 0.109416 | 3.167316E+05 | ; C19-H21, DRIH |
| 165 | method |    |   |          |              |                 |
| 166 | 19     | 22 | 1 | 0.109285 | 3.210857E+05 | ; C19-H22, DRIH |
| 167 | method |    |   |          |              |                 |
| 168 | 20     | 23 | 1 | 0.153373 | 2.677554E+05 | ; C20-C23, DRIH |
| 169 | method |    |   |          |              |                 |
| 170 | 20     | 24 | 1 | 0.109421 | 3.183093E+05 | ; C20-H24, DRIH |
| 171 | method |    |   |          |              |                 |

---

|     |        |    |   |          |              |                 |
|-----|--------|----|---|----------|--------------|-----------------|
| 172 | 20     | 25 | 1 | 0.109387 | 3.191526E+05 | ; C20-H25, DRIH |
| 173 | method |    |   |          |              |                 |
| 174 | 23     | 26 | 1 | 0.109154 | 3.241077E+05 | ; C23-H26, DRIH |
| 175 | method |    |   |          |              |                 |
| 176 | 23     | 27 | 1 | 0.109399 | 3.205481E+05 | ; C23-H27, DRIH |
| 177 | method |    |   |          |              |                 |
| 178 | 23     | 29 | 1 | 0.152797 | 2.289728E+05 | ; C23-N29, DRIH |
| 179 | method |    |   |          |              |                 |
| 180 | 28     | 29 | 1 | 0.102559 | 3.944276E+05 | ; H28-N29, DRIH |
| 181 | method |    |   |          |              |                 |
| 182 | 29     | 30 | 1 | 0.150539 | 2.590139E+05 | ; N29-C30, DRIH |
| 183 | method |    |   |          |              |                 |
| 184 | 29     | 34 | 1 | 0.150895 | 2.534838E+05 | ; N29-C34, DRIH |
| 185 | method |    |   |          |              |                 |
| 186 | 30     | 31 | 1 | 0.108993 | 3.309597E+05 | ; C30-H31, DRIH |
| 187 | method |    |   |          |              |                 |
| 188 | 30     | 32 | 1 | 0.109001 | 3.307655E+05 | ; C30-H32, DRIH |
| 189 | method |    |   |          |              |                 |
| 190 | 30     | 33 | 1 | 0.109053 | 3.305552E+05 | ; C30-H33, DRIH |
| 191 | method |    |   |          |              |                 |
| 192 | 34     | 35 | 1 | 0.109069 | 3.294482E+05 | ; C34-H35, DRIH |
| 193 | method |    |   |          |              |                 |

---

|     |                    |        |        |          |              |                    |
|-----|--------------------|--------|--------|----------|--------------|--------------------|
| 194 | 34                 | 36     | 1      | 0.108933 | 3.329083E+05 | ; C34-H36, DRIH    |
| 195 | method             |        |        |          |              |                    |
| 196 | 34                 | 37     | 1      | 0.109037 | 3.298079E+05 | ; C34-H37, DRIH    |
| 197 | method             |        |        |          |              |                    |
| 198 |                    |        |        |          |              |                    |
| 199 | [ angles ]         |        |        |          |              |                    |
| 200 | ; atom_i           | atom_j | atom_k | functype | a0 (Deg.)    | k (kJ/mol/rad^2)   |
| 201 | 2                  | 1      | 5      | 1        | 109.032      | 4.913679E+02 ; C2- |
| 202 | C1-F5, DRIH method |        |        |          |              |                    |
| 203 | 2                  | 1      | 6      | 1        | 109.812      | 5.131750E+02 ; C2- |
| 204 | C1-F6, DRIH method |        |        |          |              |                    |
| 205 | 2                  | 1      | 7      | 1        | 110.069      | 5.123328E+02 ; C2- |
| 206 | C1-F7, DRIH method |        |        |          |              |                    |
| 207 | 5                  | 1      | 6      | 1        | 109.455      | 3.132873E+02 ; F5- |
| 208 | C1-F6, DRIH method |        |        |          |              |                    |
| 209 | 5                  | 1      | 7      | 1        | 109.293      | 3.175054E+02 ; F5- |
| 210 | C1-F7, DRIH method |        |        |          |              |                    |
| 211 | 6                  | 1      | 7      | 1        | 109.164      | 3.151555E+02 ; F6- |
| 212 | C1-F7, DRIH method |        |        |          |              |                    |
| 213 | 1                  | 2      | 3      | 1        | 114.404      | 5.059364E+02 ; C1- |
| 214 | C2-C3, DRIH method |        |        |          |              |                    |
| 215 | 1                  | 2      | 8      | 1        | 108.510      | 2.029429E+02 ; C1- |

---

|     |                     |   |    |   |         |              |        |
|-----|---------------------|---|----|---|---------|--------------|--------|
| 216 | C2-F8, DRIH method  |   |    |   |         |              |        |
| 217 | 1                   | 2 | 9  | 1 | 108.180 | 2.016184E+02 | ; C1-  |
| 218 | C2-F9, DRIH method  |   |    |   |         |              |        |
| 219 | 3                   | 2 | 8  | 1 | 108.065 | 2.104123E+02 | ; C3-  |
| 220 | C2-F8, DRIH method  |   |    |   |         |              |        |
| 221 | 3                   | 2 | 9  | 1 | 107.955 | 2.063720E+02 | ; C3-  |
| 222 | C2-F9, DRIH method  |   |    |   |         |              |        |
| 223 | 8                   | 2 | 9  | 1 | 109.672 | 8.897392E+01 | ; F8-  |
| 224 | C2-F9, DRIH method  |   |    |   |         |              |        |
| 225 | 2                   | 3 | 4  | 1 | 113.769 | 4.876774E+02 | ; C2-  |
| 226 | C3-C4, DRIH method  |   |    |   |         |              |        |
| 227 | 2                   | 3 | 10 | 1 | 109.268 | 2.116850E+02 | ; C2-  |
| 228 | C3-F10, DRIH method |   |    |   |         |              |        |
| 229 | 2                   | 3 | 11 | 1 | 109.270 | 2.085036E+02 | ; C2-  |
| 230 | C3-F11, DRIH method |   |    |   |         |              |        |
| 231 | 4                   | 3 | 10 | 1 | 108.854 | 2.144307E+02 | ; C4-  |
| 232 | C3-F10, DRIH method |   |    |   |         |              |        |
| 233 | 4                   | 3 | 11 | 1 | 107.222 | 2.282253E+02 | ; C4-  |
| 234 | C3-F11, DRIH method |   |    |   |         |              |        |
| 235 | 10                  | 3 | 11 | 1 | 108.313 | 9.152912E+01 | ; F10- |
| 236 | C3-F11, DRIH method |   |    |   |         |              |        |
| 237 | 3                   | 4 | 12 | 1 | 111.004 | 1.987646E+02 | ; C3-  |



---

|     |                      |    |    |   |         |              |        |
|-----|----------------------|----|----|---|---------|--------------|--------|
| 238 | C4-F12, DRIH method  |    |    |   |         |              |        |
| 239 | 3                    | 4  | 13 | 1 | 108.776 | 1.991823E+02 | ; C3-  |
| 240 | C4-F13, DRIH method  |    |    |   |         |              |        |
| 241 | 3                    | 4  | 14 | 1 | 113.856 | 4.868951E+02 | ; C3-  |
| 242 | C4-S14, DRIH method  |    |    |   |         |              |        |
| 243 | 12                   | 4  | 13 | 1 | 109.858 | 9.043871E+01 | ; F12- |
| 244 | C4-F13, DRIH method  |    |    |   |         |              |        |
| 245 | 12                   | 4  | 14 | 1 | 106.445 | 1.868969E+02 | ; F12- |
| 246 | C4-S14, DRIH method  |    |    |   |         |              |        |
| 247 | 13                   | 4  | 14 | 1 | 106.774 | 2.001801E+02 | ; F13- |
| 248 | C4-S14, DRIH method  |    |    |   |         |              |        |
| 249 | 4                    | 14 | 15 | 1 | 103.637 | 2.040387E+02 | ; C4-  |
| 250 | S14-O15, DRIH method |    |    |   |         |              |        |
| 251 | 4                    | 14 | 16 | 1 | 107.216 | 2.008309E+02 | ; C4-  |
| 252 | S14-O16, DRIH method |    |    |   |         |              |        |
| 253 | 4                    | 14 | 17 | 1 | 106.554 | 5.049964E+02 | ; C4-  |
| 254 | S14-N17, DRIH method |    |    |   |         |              |        |
| 255 | 15                   | 14 | 16 | 1 | 123.544 | 1.036722E+02 | ; O15- |
| 256 | S14-O16, DRIH method |    |    |   |         |              |        |
| 257 | 15                   | 14 | 17 | 1 | 105.929 | 2.105154E+02 | ; O15- |
| 258 | S14-N17, DRIH method |    |    |   |         |              |        |
| 259 | 16                   | 14 | 17 | 1 | 108.817 | 1.777651E+02 | ; O16- |

---

|     |                      |    |    |   |         |              |        |
|-----|----------------------|----|----|---|---------|--------------|--------|
| 260 | S14-N17, DRIH method |    |    |   |         |              |        |
| 261 | 14                   | 17 | 18 | 1 | 113.576 | 2.677294E+02 | ; S14- |
| 262 | N17-H18, DRIH method |    |    |   |         |              |        |
| 263 | 14                   | 17 | 19 | 1 | 120.064 | 5.942509E+02 | ; S14- |
| 264 | N17-C19, DRIH method |    |    |   |         |              |        |
| 265 | 18                   | 17 | 19 | 1 | 118.847 | 2.472895E+02 | ; H18- |
| 266 | N17-C19, DRIH method |    |    |   |         |              |        |
| 267 | 17                   | 19 | 20 | 1 | 110.665 | 4.642280E+02 | ; N17- |
| 268 | C19-C20, DRIH method |    |    |   |         |              |        |
| 269 | 17                   | 19 | 21 | 1 | 110.701 | 1.749403E+02 | ; N17- |
| 270 | C19-H21, DRIH method |    |    |   |         |              |        |
| 271 | 17                   | 19 | 22 | 1 | 106.970 | 1.681431E+02 | ; N17- |
| 272 | C19-H22, DRIH method |    |    |   |         |              |        |
| 273 | 20                   | 19 | 21 | 1 | 111.782 | 1.623811E+02 | ; C20- |
| 274 | C19-H21, DRIH method |    |    |   |         |              |        |
| 275 | 20                   | 19 | 22 | 1 | 110.343 | 1.542175E+02 | ; C20- |
| 276 | C19-H22, DRIH method |    |    |   |         |              |        |
| 277 | 21                   | 19 | 22 | 1 | 106.175 | 5.882052E+01 | ; H21- |
| 278 | C19-H22, DRIH method |    |    |   |         |              |        |
| 279 | 19                   | 20 | 23 | 1 | 115.569 | 3.847051E+02 | ; C19- |
| 280 | C20-C23, DRIH method |    |    |   |         |              |        |
| 281 | 19                   | 20 | 24 | 1 | 108.539 | 1.398159E+02 | ; C19- |

---

|     |                      |    |    |   |         |              |        |
|-----|----------------------|----|----|---|---------|--------------|--------|
| 282 | C20-H24, DRIH method |    |    |   |         |              |        |
| 283 | 19                   | 20 | 25 | 1 | 108.824 | 1.452656E+02 | ; C19- |
| 284 | C20-H25, DRIH method |    |    |   |         |              |        |
| 285 | 23                   | 20 | 24 | 1 | 109.821 | 1.427173E+02 | ; C23- |
| 286 | C20-H24, DRIH method |    |    |   |         |              |        |
| 287 | 23                   | 20 | 25 | 1 | 107.842 | 1.505847E+02 | ; C23- |
| 288 | C20-H25, DRIH method |    |    |   |         |              |        |
| 289 | 24                   | 20 | 25 | 1 | 105.801 | 4.711249E+01 | ; H24- |
| 290 | C20-H25, DRIH method |    |    |   |         |              |        |
| 291 | 20                   | 23 | 26 | 1 | 110.487 | 1.444835E+02 | ; C20- |
| 292 | C23-H26, DRIH method |    |    |   |         |              |        |
| 293 | 20                   | 23 | 27 | 1 | 113.349 | 1.316719E+02 | ; C20- |
| 294 | C23-H27, DRIH method |    |    |   |         |              |        |
| 295 | 20                   | 23 | 29 | 1 | 113.524 | 6.278623E+02 | ; C20- |
| 296 | C23-N29, DRIH method |    |    |   |         |              |        |
| 297 | 26                   | 23 | 27 | 1 | 107.869 | 5.309133E+01 | ; H26- |
| 298 | C23-H27, DRIH method |    |    |   |         |              |        |
| 299 | 26                   | 23 | 29 | 1 | 105.009 | 1.849928E+02 | ; H26- |
| 300 | C23-N29, DRIH method |    |    |   |         |              |        |
| 301 | 27                   | 23 | 29 | 1 | 106.090 | 1.878100E+02 | ; H27- |
| 302 | C23-N29, DRIH method |    |    |   |         |              |        |
| 303 | 23                   | 29 | 28 | 1 | 106.244 | 5.795745E+01 | ; C23- |

---

|     |                      |    |    |   |         |              |        |
|-----|----------------------|----|----|---|---------|--------------|--------|
| 304 | N29-H28, DRIH method |    |    |   |         |              |        |
| 305 | 23                   | 29 | 30 | 1 | 111.009 | 2.028011E+02 | ; C23- |
| 306 | N29-C30, DRIH method |    |    |   |         |              |        |
| 307 | 23                   | 29 | 34 | 1 | 114.204 | 2.088544E+02 | ; C23- |
| 308 | N29-C34, DRIH method |    |    |   |         |              |        |
| 309 | 28                   | 29 | 30 | 1 | 107.442 | 5.621122E+01 | ; H28- |
| 310 | N29-C30, DRIH method |    |    |   |         |              |        |
| 311 | 28                   | 29 | 34 | 1 | 106.447 | 5.973121E+01 | ; H28- |
| 312 | N29-C34, DRIH method |    |    |   |         |              |        |
| 313 | 30                   | 29 | 34 | 1 | 111.047 | 2.026724E+02 | ; C30- |
| 314 | N29-C34, DRIH method |    |    |   |         |              |        |
| 315 | 29                   | 30 | 31 | 1 | 108.886 | 3.374338E+02 | ; N29- |
| 316 | C30-H31, DRIH method |    |    |   |         |              |        |
| 317 | 29                   | 30 | 32 | 1 | 109.222 | 3.378771E+02 | ; N29- |
| 318 | C30-H32, DRIH method |    |    |   |         |              |        |
| 319 | 29                   | 30 | 33 | 1 | 108.501 | 3.374056E+02 | ; N29- |
| 320 | C30-H33, DRIH method |    |    |   |         |              |        |
| 321 | 31                   | 30 | 32 | 1 | 110.098 | 1.414139E+02 | ; H31- |
| 322 | C30-H32, DRIH method |    |    |   |         |              |        |
| 323 | 31                   | 30 | 33 | 1 | 109.952 | 1.386289E+02 | ; H31- |
| 324 | C30-H33, DRIH method |    |    |   |         |              |        |
| 325 | 32                   | 30 | 33 | 1 | 110.147 | 1.399058E+02 | ; H32- |

---

326 C30-H33, DRIH method

327        29        34        35        1        108.227        3.360063E+02        ; N29-

328 C34-H35, DRIH method

329        29        34        36        1        109.460        3.583962E+02        ; N29-

330 C34-H36, DRIH method

331        29        34        37        1        108.155        3.490619E+02        ; N29-

332 C34-H37, DRIH method

333        35        34        36        1        111.651        1.439548E+02        ; H35-

334 C34-H36, DRIH method

335        35        34        37        1        109.802        1.362082E+02        ; H35-

336 C34-H37, DRIH method

337        36        34        37        1        109.472        1.436319E+02        ; H36-

338 C34-H37, DRIH method

339

340 [ angles ] ; bond-bond cross term

341 ; atom\_i atom\_j atom\_k functype r0\_ij (nm) r0\_jk (nm) k (kJ/mol/nm^2)

342        2        1        5        3        0.155389        0.133166        1.882445E+04

343 ; C2-C1-F5

344        2        1        6        3        0.155389        0.133987        1.857239E+04

345 ; C2-C1-F6

346        2        1        7        3        0.155389        0.133815        1.771504E+04

347 ; C2-C1-F7

---

|     |             |   |    |   |          |          |              |
|-----|-------------|---|----|---|----------|----------|--------------|
| 348 | 5           | 1 | 6  | 3 | 0.133166 | 0.133987 | 4.755793E+04 |
| 349 | ; F5-C1-F6  |   |    |   |          |          |              |
| 350 | 5           | 1 | 7  | 3 | 0.133166 | 0.133815 | 4.815618E+04 |
| 351 | ; F5-C1-F7  |   |    |   |          |          |              |
| 352 | 6           | 1 | 7  | 3 | 0.133987 | 0.133815 | 4.721050E+04 |
| 353 | ; F6-C1-F7  |   |    |   |          |          |              |
| 354 | 1           | 2 | 3  | 3 | 0.155389 | 0.155443 | 1.810541E+04 |
| 355 | ; C1-C2-C3  |   |    |   |          |          |              |
| 356 | 1           | 2 | 8  | 3 | 0.155389 | 0.134595 | 1.632735E+04 |
| 357 | ; C1-C2-F8  |   |    |   |          |          |              |
| 358 | 1           | 2 | 9  | 3 | 0.155389 | 0.135464 | 1.632810E+04 |
| 359 | ; C1-C2-F9  |   |    |   |          |          |              |
| 360 | 3           | 2 | 8  | 3 | 0.155443 | 0.134595 | 2.059068E+04 |
| 361 | ; C3-C2-F8  |   |    |   |          |          |              |
| 362 | 3           | 2 | 9  | 3 | 0.155443 | 0.135464 | 2.062466E+04 |
| 363 | ; C3-C2-F9  |   |    |   |          |          |              |
| 364 | 8           | 2 | 9  | 3 | 0.134595 | 0.135464 | 4.534865E+04 |
| 365 | ; F8-C2-F9  |   |    |   |          |          |              |
| 366 | 2           | 3 | 4  | 3 | 0.155443 | 0.155337 | 1.818061E+04 |
| 367 | ; C2-C3-C4  |   |    |   |          |          |              |
| 368 | 2           | 3 | 10 | 3 | 0.155443 | 0.135336 | 1.643739E+04 |
| 369 | ; C2-C3-F10 |   |    |   |          |          |              |

---

|     |              |    |    |   |          |          |               |
|-----|--------------|----|----|---|----------|----------|---------------|
| 370 | 2            | 3  | 11 | 3 | 0.155443 | 0.136231 | 1.490990E+04  |
| 371 | ; C2-C3-F11  |    |    |   |          |          |               |
| 372 | 4            | 3  | 10 | 3 | 0.155337 | 0.135336 | 2.028434E+04  |
| 373 | ; C4-C3-F10  |    |    |   |          |          |               |
| 374 | 4            | 3  | 11 | 3 | 0.155337 | 0.136231 | 1.959414E+04  |
| 375 | ; C4-C3-F11  |    |    |   |          |          |               |
| 376 | 10           | 3  | 11 | 3 | 0.135336 | 0.136231 | 4.619977E+04  |
| 377 | ; F10-C3-F11 |    |    |   |          |          |               |
| 378 | 3            | 4  | 12 | 3 | 0.155337 | 0.133683 | 1.725833E+04  |
| 379 | ; C3-C4-F12  |    |    |   |          |          |               |
| 380 | 3            | 4  | 13 | 3 | 0.155337 | 0.135282 | 1.654045E+04  |
| 381 | ; C3-C4-F13  |    |    |   |          |          |               |
| 382 | 3            | 4  | 14 | 3 | 0.155337 | 0.190782 | 1.639006E+04  |
| 383 | ; C3-C4-S14  |    |    |   |          |          |               |
| 384 | 12           | 4  | 13 | 3 | 0.133683 | 0.135282 | 4.384892E+04  |
| 385 | ; F12-C4-F13 |    |    |   |          |          |               |
| 386 | 12           | 4  | 14 | 3 | 0.133683 | 0.190782 | 1.765931E+04  |
| 387 | ; F12-C4-S14 |    |    |   |          |          |               |
| 388 | 13           | 4  | 14 | 3 | 0.135282 | 0.190782 | 1.595542E+04  |
| 389 | ; F13-C4-S14 |    |    |   |          |          |               |
| 390 | 4            | 14 | 15 | 3 | 0.190782 | 0.146875 | -2.989052E+03 |
| 391 | ; C4-S14-O15 |    |    |   |          |          |               |

---

|     |               |    |    |   |          |          |               |
|-----|---------------|----|----|---|----------|----------|---------------|
| 392 | 4             | 14 | 16 | 3 | 0.190782 | 0.144959 | -3.804864E+03 |
| 393 | ; C4-S14-O16  |    |    |   |          |          |               |
| 394 | 4             | 14 | 17 | 3 | 0.190782 | 0.165882 | -1.353775E+02 |
| 395 | ; C4-S14-N17  |    |    |   |          |          |               |
| 396 | 15            | 14 | 16 | 3 | 0.146875 | 0.144959 | -5.772634E+03 |
| 397 | ; O15-S14-O16 |    |    |   |          |          |               |
| 398 | 15            | 14 | 17 | 3 | 0.146875 | 0.165882 | 1.024076E+04  |
| 399 | ; O15-S14-N17 |    |    |   |          |          |               |
| 400 | 16            | 14 | 17 | 3 | 0.144959 | 0.165882 | 6.187132E+03  |
| 401 | ; O16-S14-N17 |    |    |   |          |          |               |
| 402 | 14            | 17 | 18 | 3 | 0.165882 | 0.101441 | 3.610517E+03  |
| 403 | ; S14-N17-H18 |    |    |   |          |          |               |
| 404 | 14            | 17 | 19 | 3 | 0.165882 | 0.146927 | 2.434791E+04  |
| 405 | ; S14-N17-C19 |    |    |   |          |          |               |
| 406 | 18            | 17 | 19 | 3 | 0.101441 | 0.146927 | -1.888816E+03 |
| 407 | ; H18-N17-C19 |    |    |   |          |          |               |
| 408 | 17            | 19 | 20 | 3 | 0.146927 | 0.154383 | 2.411113E+04  |
| 409 | ; N17-C19-C20 |    |    |   |          |          |               |
| 410 | 17            | 19 | 21 | 3 | 0.146927 | 0.109416 | 9.551602E+03  |
| 411 | ; N17-C19-H21 |    |    |   |          |          |               |
| 412 | 17            | 19 | 22 | 3 | 0.146927 | 0.109285 | 4.721538E+03  |
| 413 | ; N17-C19-H22 |    |    |   |          |          |               |



---

|     |               |    |    |   |          |          |              |
|-----|---------------|----|----|---|----------|----------|--------------|
| 414 | 20            | 19 | 21 | 3 | 0.154383 | 0.109416 | 4.297605E+03 |
| 415 | ; C20-C19-H21 |    |    |   |          |          |              |
| 416 | 20            | 19 | 22 | 3 | 0.154383 | 0.109285 | 4.594315E+03 |
| 417 | ; C20-C19-H22 |    |    |   |          |          |              |
| 418 | 21            | 19 | 22 | 3 | 0.109416 | 0.109285 | 2.694372E+03 |
| 419 | ; H21-C19-H22 |    |    |   |          |          |              |
| 420 | 19            | 20 | 23 | 3 | 0.154383 | 0.153373 | 1.165562E+04 |
| 421 | ; C19-C20-C23 |    |    |   |          |          |              |
| 422 | 19            | 20 | 24 | 3 | 0.154383 | 0.109421 | 1.797977E+03 |
| 423 | ; C19-C20-H24 |    |    |   |          |          |              |
| 424 | 19            | 20 | 25 | 3 | 0.154383 | 0.109387 | 4.369948E+03 |
| 425 | ; C19-C20-H25 |    |    |   |          |          |              |
| 426 | 23            | 20 | 24 | 3 | 0.153373 | 0.109421 | 3.703793E+03 |
| 427 | ; C23-C20-H24 |    |    |   |          |          |              |
| 428 | 23            | 20 | 25 | 3 | 0.153373 | 0.109387 | 2.757998E+03 |
| 429 | ; C23-C20-H25 |    |    |   |          |          |              |
| 430 | 24            | 20 | 25 | 3 | 0.109421 | 0.109387 | 2.259958E+03 |
| 431 | ; H24-C20-H25 |    |    |   |          |          |              |
| 432 | 20            | 23 | 26 | 3 | 0.153373 | 0.109154 | 3.844459E+03 |
| 433 | ; C20-C23-H26 |    |    |   |          |          |              |
| 434 | 20            | 23 | 27 | 3 | 0.153373 | 0.109399 | 5.048128E+03 |
| 435 | ; C20-C23-H27 |    |    |   |          |          |              |

---

|     |               |    |    |   |          |          |              |
|-----|---------------|----|----|---|----------|----------|--------------|
| 436 | 20            | 23 | 29 | 3 | 0.153373 | 0.152797 | 1.892973E+04 |
| 437 | ; C20-C23-N29 |    |    |   |          |          |              |
| 438 | 26            | 23 | 27 | 3 | 0.109154 | 0.109399 | 2.115115E+03 |
| 439 | ; H26-C23-H27 |    |    |   |          |          |              |
| 440 | 26            | 23 | 29 | 3 | 0.109154 | 0.152797 | 3.579857E+03 |
| 441 | ; H26-C23-N29 |    |    |   |          |          |              |
| 442 | 27            | 23 | 29 | 3 | 0.109399 | 0.152797 | 4.508942E+03 |
| 443 | ; H27-C23-N29 |    |    |   |          |          |              |
| 444 | 23            | 29 | 28 | 3 | 0.152797 | 0.102559 | 4.774977E+03 |
| 445 | ; C23-N29-H28 |    |    |   |          |          |              |
| 446 | 23            | 29 | 30 | 3 | 0.152797 | 0.150539 | 1.135273E+04 |
| 447 | ; C23-N29-C30 |    |    |   |          |          |              |
| 448 | 23            | 29 | 34 | 3 | 0.152797 | 0.150895 | 9.948979E+03 |
| 449 | ; C23-N29-C34 |    |    |   |          |          |              |
| 450 | 28            | 29 | 30 | 3 | 0.102559 | 0.150539 | 3.668456E+03 |
| 451 | ; H28-N29-C30 |    |    |   |          |          |              |
| 452 | 28            | 29 | 34 | 3 | 0.102559 | 0.150895 | 4.503013E+03 |
| 453 | ; H28-N29-C34 |    |    |   |          |          |              |
| 454 | 30            | 29 | 34 | 3 | 0.150539 | 0.150895 | 1.062195E+04 |
| 455 | ; C30-N29-C34 |    |    |   |          |          |              |
| 456 | 29            | 30 | 31 | 3 | 0.150539 | 0.108993 | 3.233846E+03 |
| 457 | ; N29-C30-H31 |    |    |   |          |          |              |

---

|     |               |    |    |   |          |          |              |
|-----|---------------|----|----|---|----------|----------|--------------|
| 458 | 29            | 30 | 32 | 3 | 0.150539 | 0.109001 | 3.292064E+03 |
| 459 | ; N29-C30-H32 |    |    |   |          |          |              |
| 460 | 29            | 30 | 33 | 3 | 0.150539 | 0.109053 | 4.275582E+03 |
| 461 | ; N29-C30-H33 |    |    |   |          |          |              |
| 462 | 31            | 30 | 32 | 3 | 0.108993 | 0.109001 | 1.534402E+03 |
| 463 | ; H31-C30-H32 |    |    |   |          |          |              |
| 464 | 31            | 30 | 33 | 3 | 0.108993 | 0.109053 | 1.477296E+03 |
| 465 | ; H31-C30-H33 |    |    |   |          |          |              |
| 466 | 32            | 30 | 33 | 3 | 0.109001 | 0.109053 | 1.433538E+03 |
| 467 | ; H32-C30-H33 |    |    |   |          |          |              |
| 468 | 29            | 34 | 35 | 3 | 0.150895 | 0.109069 | 4.341486E+03 |
| 469 | ; N29-C34-H35 |    |    |   |          |          |              |
| 470 | 29            | 34 | 36 | 3 | 0.150895 | 0.108933 | 3.350185E+03 |
| 471 | ; N29-C34-H36 |    |    |   |          |          |              |
| 472 | 29            | 34 | 37 | 3 | 0.150895 | 0.109037 | 2.976845E+03 |
| 473 | ; N29-C34-H37 |    |    |   |          |          |              |
| 474 | 35            | 34 | 36 | 3 | 0.109069 | 0.108933 | 9.045900E+02 |
| 475 | ; H35-C34-H36 |    |    |   |          |          |              |
| 476 | 35            | 34 | 37 | 3 | 0.109069 | 0.109037 | 1.492227E+03 |
| 477 | ; H35-C34-H37 |    |    |   |          |          |              |
| 478 | 36            | 34 | 37 | 3 | 0.108933 | 0.109037 | 1.490258E+03 |
| 479 | ; H36-C34-H37 |    |    |   |          |          |              |

---

480

481 [ dihedrals ] ; propers

482 ; atom\_i atom\_j atom\_k atom\_l functype d0 (Deg.) k (kJ/mol/rad^2) ; Case

483 of functype=2

484 ; atom\_i atom\_j atom\_k atom\_l functype phase (Deg.) kd (kJ/mol) pn ; Case

485 of functype=9

|     |                           |   |   |    |   |         |              |   |
|-----|---------------------------|---|---|----|---|---------|--------------|---|
| 486 | 1                         | 2 | 3 | 4  | 2 | 165.216 | 5.501244E+01 | ; |
| 487 | C1-C2-C3-C4, DRIH method  |   |   |    |   |         |              |   |
| 488 | 1                         | 2 | 3 | 10 | 2 | -72.913 | 6.797000E+01 | ; |
| 489 | C1-C2-C3-F10, DRIH method |   |   |    |   |         |              |   |
| 490 | 1                         | 2 | 3 | 11 | 2 | 45.434  | 7.014663E+01 | ; |
| 491 | C1-C2-C3-F11, DRIH method |   |   |    |   |         |              |   |
| 492 | 2                         | 3 | 4 | 12 | 2 | 42.082  | 6.549520E+01 | ; |
| 493 | C2-C3-C4-F12, DRIH method |   |   |    |   |         |              |   |
| 494 | 2                         | 3 | 4 | 13 | 2 | -78.905 | 7.028344E+01 | ; |
| 495 | C2-C3-C4-F13, DRIH method |   |   |    |   |         |              |   |
| 496 | 2                         | 3 | 4 | 14 | 2 | 162.172 | 5.210252E+01 | ; |
| 497 | C2-C3-C4-S14, DRIH method |   |   |    |   |         |              |   |
| 498 | 3                         | 2 | 1 | 5  | 2 | 169.998 | 7.542723E+01 | ; |
| 499 | C3-C2-C1-F5, DRIH method  |   |   |    |   |         |              |   |
| 500 | 3                         | 2 | 1 | 6  | 2 | 50.080  | 7.325384E+01 | ; |
| 501 | C3-C2-C1-F6, DRIH method  |   |   |    |   |         |              |   |

---

|     |                             |    |    |    |   |         |              |   |
|-----|-----------------------------|----|----|----|---|---------|--------------|---|
| 502 | 3                           | 2  | 1  | 7  | 2 | -70.126 | 7.660367E+01 | ; |
| 503 | C3-C2-C1-F7, DRIH method    |    |    |    |   |         |              |   |
| 504 | 3                           | 4  | 14 | 15 | 2 | 151.120 | 8.472903E+01 | ; |
| 505 | C3-C4-S14-O15, DRIH method  |    |    |    |   |         |              |   |
| 506 | 3                           | 4  | 14 | 16 | 2 | -76.778 | 6.859521E+01 | ; |
| 507 | C3-C4-S14-O16, DRIH method  |    |    |    |   |         |              |   |
| 508 | 3                           | 4  | 14 | 17 | 2 | 39.605  | 7.444749E+01 | ; |
| 509 | C3-C4-S14-N17, DRIH method  |    |    |    |   |         |              |   |
| 510 | 4                           | 3  | 2  | 8  | 2 | -73.809 | 7.117386E+01 | ; |
| 511 | C4-C3-C2-F8, DRIH method    |    |    |    |   |         |              |   |
| 512 | 4                           | 3  | 2  | 9  | 2 | 44.741  | 6.991651E+01 | ; |
| 513 | C4-C3-C2-F9, DRIH method    |    |    |    |   |         |              |   |
| 514 | 4                           | 14 | 17 | 18 | 2 | -74.814 | 5.023196E+01 | ; |
| 515 | C4-S14-N17-H18, DRIH method |    |    |    |   |         |              |   |
| 516 | 4                           | 14 | 17 | 19 | 2 | 74.597  | 5.905141E+01 | ; |
| 517 | C4-S14-N17-C19, DRIH method |    |    |    |   |         |              |   |
| 518 | 5                           | 1  | 2  | 8  | 2 | 49.269  | 8.645564E+01 | ; |
| 519 | F5-C1-C2-F8, DRIH method    |    |    |    |   |         |              |   |
| 520 | 5                           | 1  | 2  | 9  | 2 | -69.651 | 8.365828E+01 | ; |
| 521 | F5-C1-C2-F9, DRIH method    |    |    |    |   |         |              |   |
| 522 | 6                           | 1  | 2  | 8  | 2 | -70.649 | 8.558021E+01 | ; |
| 523 | F6-C1-C2-F8, DRIH method    |    |    |    |   |         |              |   |

---

|     |                            |   |   |    |   |         |              |   |
|-----|----------------------------|---|---|----|---|---------|--------------|---|
| 524 | 6                          | 1 | 2 | 9  | 2 | 170.431 | 8.527121E+01 | ; |
| 525 | F6-C1-C2-F9, DRIH method   |   |   |    |   |         |              |   |
| 526 | 7                          | 1 | 2 | 8  | 2 | 169.145 | 8.740507E+01 | ; |
| 527 | F7-C1-C2-F8, DRIH method   |   |   |    |   |         |              |   |
| 528 | 7                          | 1 | 2 | 9  | 2 | 50.225  | 8.629376E+01 | ; |
| 529 | F7-C1-C2-F9, DRIH method   |   |   |    |   |         |              |   |
| 530 | 8                          | 2 | 3 | 10 | 2 | 48.062  | 7.752231E+01 | ; |
| 531 | F8-C2-C3-F10, DRIH method  |   |   |    |   |         |              |   |
| 532 | 8                          | 2 | 3 | 11 | 2 | 166.410 | 8.469321E+01 | ; |
| 533 | F8-C2-C3-F11, DRIH method  |   |   |    |   |         |              |   |
| 534 | 9                          | 2 | 3 | 10 | 2 | 166.611 | 8.206349E+01 | ; |
| 535 | F9-C2-C3-F10, DRIH method  |   |   |    |   |         |              |   |
| 536 | 9                          | 2 | 3 | 11 | 2 | -75.041 | 8.144385E+01 | ; |
| 537 | F9-C2-C3-F11, DRIH method  |   |   |    |   |         |              |   |
| 538 | 10                         | 3 | 4 | 12 | 2 | -80.018 | 7.694374E+01 | ; |
| 539 | F10-C3-C4-F12, DRIH method |   |   |    |   |         |              |   |
| 540 | 10                         | 3 | 4 | 13 | 2 | 158.995 | 8.507576E+01 | ; |
| 541 | F10-C3-C4-F13, DRIH method |   |   |    |   |         |              |   |
| 542 | 10                         | 3 | 4 | 14 | 2 | 40.072  | 6.663090E+01 | ; |
| 543 | F10-C3-C4-S14, DRIH method |   |   |    |   |         |              |   |
| 544 | 11                         | 3 | 4 | 12 | 2 | 163.017 | 8.148157E+01 | ; |
| 545 | F11-C3-C4-F12, DRIH method |   |   |    |   |         |              |   |

---

|     |                              |    |    |    |   |          |              |   |
|-----|------------------------------|----|----|----|---|----------|--------------|---|
| 546 | 11                           | 3  | 4  | 13 | 2 | 42.029   | 7.945049E+01 | ; |
| 547 | F11-C3-C4-F13, DRIH method   |    |    |    |   |          |              |   |
| 548 | 11                           | 3  | 4  | 14 | 2 | -76.894  | 7.121577E+01 | ; |
| 549 | F11-C3-C4-S14, DRIH method   |    |    |    |   |          |              |   |
| 550 | 12                           | 4  | 14 | 15 | 2 | -86.253  | 8.590705E+01 | ; |
| 551 | F12-C4-S14-O15, DRIH method  |    |    |    |   |          |              |   |
| 552 | 12                           | 4  | 14 | 16 | 2 | 45.848   | 7.659234E+01 | ; |
| 553 | F12-C4-S14-O16, DRIH method  |    |    |    |   |          |              |   |
| 554 | 12                           | 4  | 14 | 17 | 2 | 162.232  | 7.821634E+01 | ; |
| 555 | F12-C4-S14-N17, DRIH method  |    |    |    |   |          |              |   |
| 556 | 13                           | 4  | 14 | 15 | 2 | 31.062   | 9.087507E+01 | ; |
| 557 | F13-C4-S14-O15, DRIH method  |    |    |    |   |          |              |   |
| 558 | 13                           | 4  | 14 | 16 | 2 | 163.164  | 8.119484E+01 | ; |
| 559 | F13-C4-S14-O16, DRIH method  |    |    |    |   |          |              |   |
| 560 | 13                           | 4  | 14 | 17 | 2 | -80.453  | 8.233422E+01 | ; |
| 561 | F13-C4-S14-N17, DRIH method  |    |    |    |   |          |              |   |
| 562 | 14                           | 17 | 19 | 20 | 2 | 85.664   | 5.110855E+01 | ; |
| 563 | S14-N17-C19-C20, DRIH method |    |    |    |   |          |              |   |
| 564 | 14                           | 17 | 19 | 21 | 2 | -38.843  | 4.057052E+01 | ; |
| 565 | S14-N17-C19-H21, DRIH method |    |    |    |   |          |              |   |
| 566 | 14                           | 17 | 19 | 22 | 2 | -154.100 | 4.484969E+01 | ; |
| 567 | S14-N17-C19-H22, DRIH method |    |    |    |   |          |              |   |

---

|     |                              |    |    |    |   |          |              |   |
|-----|------------------------------|----|----|----|---|----------|--------------|---|
| 568 | 15                           | 14 | 17 | 18 | 2 | 175.271  | 9.258084E+01 | ; |
| 569 | O15-S14-N17-H18, DRIH method |    |    |    |   |          |              |   |
| 570 | 15                           | 14 | 17 | 19 | 2 | -35.318  | 9.112091E+01 | ; |
| 571 | O15-S14-N17-C19, DRIH method |    |    |    |   |          |              |   |
| 572 | 16                           | 14 | 17 | 18 | 2 | 40.495   | 7.185781E+01 | ; |
| 573 | O16-S14-N17-H18, DRIH method |    |    |    |   |          |              |   |
| 574 | 16                           | 14 | 17 | 19 | 2 | -170.095 | 8.194380E+01 | ; |
| 575 | O16-S14-N17-C19, DRIH method |    |    |    |   |          |              |   |
| 576 | 17                           | 19 | 20 | 23 | 2 | -159.808 | 8.252392E+01 | ; |
| 577 | N17-C19-C20-C23, DRIH method |    |    |    |   |          |              |   |
| 578 | 17                           | 19 | 20 | 24 | 2 | -35.965  | 5.353843E+01 | ; |
| 579 | N17-C19-C20-H24, DRIH method |    |    |    |   |          |              |   |
| 580 | 17                           | 19 | 20 | 25 | 2 | 78.729   | 5.583712E+01 | ; |
| 581 | N17-C19-C20-H25, DRIH method |    |    |    |   |          |              |   |
| 582 | 18                           | 17 | 19 | 20 | 2 | -126.509 | 4.407865E+01 | ; |
| 583 | H18-N17-C19-C20, DRIH method |    |    |    |   |          |              |   |
| 584 | 18                           | 17 | 19 | 21 | 2 | 108.984  | 4.107677E+01 | ; |
| 585 | H18-N17-C19-H21, DRIH method |    |    |    |   |          |              |   |
| 586 | 18                           | 17 | 19 | 22 | 2 | -6.274   | 3.585317E+01 | ; |
| 587 | H18-N17-C19-H22, DRIH method |    |    |    |   |          |              |   |
| 588 | 19                           | 20 | 23 | 26 | 2 | -146.786 | 5.076100E+01 | ; |
| 589 | C19-C20-C23-H26, DRIH method |    |    |    |   |          |              |   |



---

|     |                              |    |    |    |   |          |              |   |
|-----|------------------------------|----|----|----|---|----------|--------------|---|
| 590 | 19                           | 20 | 23 | 27 | 2 | -25.583  | 3.889020E+01 | ; |
| 591 | C19-C20-C23-H27, DRIH method |    |    |    |   |          |              |   |
| 592 | 19                           | 20 | 23 | 29 | 2 | 95.558   | 5.695042E+01 | ; |
| 593 | C19-C20-C23-N29, DRIH method |    |    |    |   |          |              |   |
| 594 | 20                           | 23 | 29 | 28 | 2 | 48.130   | 3.147030E+01 | ; |
| 595 | C20-C23-N29-H28, DRIH method |    |    |    |   |          |              |   |
| 596 | 20                           | 23 | 29 | 30 | 2 | 164.639  | 4.330028E+01 | ; |
| 597 | C20-C23-N29-C30, DRIH method |    |    |    |   |          |              |   |
| 598 | 20                           | 23 | 29 | 34 | 2 | -68.890  | 5.391992E+01 | ; |
| 599 | C20-C23-N29-C34, DRIH method |    |    |    |   |          |              |   |
| 600 | 21                           | 19 | 20 | 23 | 2 | -35.919  | 4.585445E+01 | ; |
| 601 | H21-C19-C20-C23, DRIH method |    |    |    |   |          |              |   |
| 602 | 21                           | 19 | 20 | 24 | 2 | 87.924   | 4.592077E+01 | ; |
| 603 | H21-C19-C20-H24, DRIH method |    |    |    |   |          |              |   |
| 604 | 21                           | 19 | 20 | 25 | 2 | -157.382 | 4.144294E+01 | ; |
| 605 | H21-C19-C20-H25, DRIH method |    |    |    |   |          |              |   |
| 606 | 22                           | 19 | 20 | 23 | 2 | 81.993   | 5.072570E+01 | ; |
| 607 | H22-C19-C20-C23, DRIH method |    |    |    |   |          |              |   |
| 608 | 22                           | 19 | 20 | 24 | 2 | -154.164 | 4.262320E+01 | ; |
| 609 | H22-C19-C20-H24, DRIH method |    |    |    |   |          |              |   |
| 610 | 22                           | 19 | 20 | 25 | 2 | -39.470  | 4.341952E+01 | ; |
| 611 | H22-C19-C20-H25, DRIH method |    |    |    |   |          |              |   |

---

|     |                              |    |    |    |   |          |              |   |
|-----|------------------------------|----|----|----|---|----------|--------------|---|
| 612 | 23                           | 29 | 30 | 31 | 2 | -176.717 | 4.482127E+01 | ; |
| 613 | C23-N29-C30-H31, DRIH method |    |    |    |   |          |              |   |
| 614 | 23                           | 29 | 30 | 32 | 2 | -56.458  | 4.417359E+01 | ; |
| 615 | C23-N29-C30-H32, DRIH method |    |    |    |   |          |              |   |
| 616 | 23                           | 29 | 30 | 33 | 2 | 63.628   | 4.379841E+01 | ; |
| 617 | C23-N29-C30-H33, DRIH method |    |    |    |   |          |              |   |
| 618 | 23                           | 29 | 34 | 35 | 2 | -58.102  | 4.202271E+01 | ; |
| 619 | C23-N29-C34-H35, DRIH method |    |    |    |   |          |              |   |
| 620 | 23                           | 29 | 34 | 36 | 2 | 63.791   | 4.880560E+01 | ; |
| 621 | C23-N29-C34-H36, DRIH method |    |    |    |   |          |              |   |
| 622 | 23                           | 29 | 34 | 37 | 2 | -177.005 | 4.369909E+01 | ; |
| 623 | C23-N29-C34-H37, DRIH method |    |    |    |   |          |              |   |
| 624 | 24                           | 20 | 23 | 26 | 2 | 90.044   | 4.196900E+01 | ; |
| 625 | H24-C20-C23-H26, DRIH method |    |    |    |   |          |              |   |
| 626 | 24                           | 20 | 23 | 27 | 2 | -148.753 | 4.801704E+01 | ; |
| 627 | H24-C20-C23-H27, DRIH method |    |    |    |   |          |              |   |
| 628 | 24                           | 20 | 23 | 29 | 2 | -27.612  | 4.214966E+01 | ; |
| 629 | H24-C20-C23-N29, DRIH method |    |    |    |   |          |              |   |
| 630 | 25                           | 20 | 23 | 26 | 2 | -24.796  | 4.430040E+01 | ; |
| 631 | H25-C20-C23-H26, DRIH method |    |    |    |   |          |              |   |
| 632 | 25                           | 20 | 23 | 27 | 2 | 96.407   | 4.492455E+01 | ; |
| 633 | H25-C20-C23-H27, DRIH method |    |    |    |   |          |              |   |

---

|     |                              |    |    |    |   |          |              |   |
|-----|------------------------------|----|----|----|---|----------|--------------|---|
| 634 | 25                           | 20 | 23 | 29 | 2 | -142.452 | 4.917695E+01 | ; |
| 635 | H25-C20-C23-N29, DRIH method |    |    |    |   |          |              |   |
| 636 | 26                           | 23 | 29 | 28 | 2 | -72.662  | 3.381445E+01 | ; |
| 637 | H26-C23-N29-H28, DRIH method |    |    |    |   |          |              |   |
| 638 | 26                           | 23 | 29 | 30 | 2 | 43.848   | 4.399603E+01 | ; |
| 639 | H26-C23-N29-C30, DRIH method |    |    |    |   |          |              |   |
| 640 | 26                           | 23 | 29 | 34 | 2 | 170.318  | 5.035773E+01 | ; |
| 641 | H26-C23-N29-C34, DRIH method |    |    |    |   |          |              |   |
| 642 | 27                           | 23 | 29 | 28 | 2 | 173.261  | 3.459394E+01 | ; |
| 643 | H27-C23-N29-H28, DRIH method |    |    |    |   |          |              |   |
| 644 | 27                           | 23 | 29 | 30 | 2 | -70.230  | 4.271399E+01 | ; |
| 645 | H27-C23-N29-C30, DRIH method |    |    |    |   |          |              |   |
| 646 | 27                           | 23 | 29 | 34 | 2 | 56.241   | 4.150892E+01 | ; |
| 647 | H27-C23-N29-C34, DRIH method |    |    |    |   |          |              |   |
| 648 | 28                           | 29 | 30 | 31 | 2 | -60.946  | 3.338447E+01 | ; |
| 649 | H28-N29-C30-H31, DRIH method |    |    |    |   |          |              |   |
| 650 | 28                           | 29 | 30 | 32 | 2 | 59.312   | 3.335490E+01 | ; |
| 651 | H28-N29-C30-H32, DRIH method |    |    |    |   |          |              |   |
| 652 | 28                           | 29 | 30 | 33 | 2 | 179.399  | 3.344992E+01 | ; |
| 653 | H28-N29-C30-H33, DRIH method |    |    |    |   |          |              |   |
| 654 | 28                           | 29 | 34 | 35 | 2 | -175.004 | 3.391175E+01 | ; |
| 655 | H28-N29-C34-H35, DRIH method |    |    |    |   |          |              |   |

---

|     |                              |    |    |    |   |          |              |   |
|-----|------------------------------|----|----|----|---|----------|--------------|---|
| 656 | 28                           | 29 | 34 | 36 | 2 | -53.112  | 3.419062E+01 | ; |
| 657 | H28-N29-C34-H36, DRIH method |    |    |    |   |          |              |   |
| 658 | 28                           | 29 | 34 | 37 | 2 | 66.092   | 3.278750E+01 | ; |
| 659 | H28-N29-C34-H37, DRIH method |    |    |    |   |          |              |   |
| 660 | 30                           | 29 | 34 | 35 | 2 | 68.350   | 4.224944E+01 | ; |
| 661 | C30-N29-C34-H35, DRIH method |    |    |    |   |          |              |   |
| 662 | 30                           | 29 | 34 | 36 | 2 | -169.758 | 4.502496E+01 | ; |
| 663 | C30-N29-C34-H36, DRIH method |    |    |    |   |          |              |   |
| 664 | 30                           | 29 | 34 | 37 | 2 | -50.554  | 4.145878E+01 | ; |
| 665 | C30-N29-C34-H37, DRIH method |    |    |    |   |          |              |   |
| 666 | 31                           | 30 | 29 | 34 | 2 | 55.087   | 4.396626E+01 | ; |
| 667 | H31-C30-N29-C34, DRIH method |    |    |    |   |          |              |   |
| 668 | 32                           | 30 | 29 | 34 | 2 | 175.346  | 4.509663E+01 | ; |
| 669 | H32-C30-N29-C34, DRIH method |    |    |    |   |          |              |   |
| 670 | 33                           | 30 | 29 | 34 | 2 | -64.568  | 4.399271E+01 | ; |
| 671 | H33-C30-N29-C34, DRIH method |    |    |    |   |          |              |   |
| 672 |                              |    |    |    |   |          |              |   |

---

673 **1-OA.itp**

674 [ moleculetype ]

675 ; name nrexcl

676 1-OA 3

677

678 [ atoms ]

679 ; Index type residue resname atom cgnr charge mass

680 1 c3 1 MOL C1 1 -0.25374112

681 12.010736

682 2 c3 1 MOL C2 2 0.11213405

683 12.010736

684 3 h1 1 MOL H3 3 0.06842264

685 1.007941

686 4 h1 1 MOL H4 4 0.06842264

687 1.007941

688 5 c3 1 MOL C5 5 0.02372227

689 12.010736

690 6 hc 1 MOL H6 6 -0.00720387

691 1.007941

692 7 hc 1 MOL H7 7 -0.00720387

693 1.007941

---

|     |           |    |   |     |     |    |             |
|-----|-----------|----|---|-----|-----|----|-------------|
| 694 | 8         | c3 | 1 | MOL | C8  | 8  | 0.04250598  |
| 695 | 12.010736 |    |   |     |     |    |             |
| 696 | 9         | hc | 1 | MOL | H9  | 9  | -0.02275900 |
| 697 | 1.007941  |    |   |     |     |    |             |
| 698 | 10        | hc | 1 | MOL | H10 | 10 | -0.02275900 |
| 699 | 1.007941  |    |   |     |     |    |             |
| 700 | 11        | hc | 1 | MOL | H11 | 11 | -0.02154117 |
| 701 | 1.007941  |    |   |     |     |    |             |
| 702 | 12        | hc | 1 | MOL | H12 | 12 | -0.02154117 |
| 703 | 1.007941  |    |   |     |     |    |             |
| 704 | 13        | c3 | 1 | MOL | C13 | 13 | -0.00658163 |
| 705 | 12.010736 |    |   |     |     |    |             |
| 706 | 14        | c3 | 1 | MOL | C14 | 14 | -0.00714000 |
| 707 | 12.010736 |    |   |     |     |    |             |
| 708 | 15        | hc | 1 | MOL | H15 | 15 | -0.01297870 |
| 709 | 1.007941  |    |   |     |     |    |             |
| 710 | 16        | hc | 1 | MOL | H16 | 16 | -0.01297870 |
| 711 | 1.007941  |    |   |     |     |    |             |
| 712 | 17        | c3 | 1 | MOL | C17 | 17 | 0.12778662  |
| 713 | 12.010736 |    |   |     |     |    |             |
| 714 | 18        | hc | 1 | MOL | H18 | 18 | 0.00074076  |
| 715 | 1.007941  |    |   |     |     |    |             |

---

|     |           |    |   |     |     |    |             |
|-----|-----------|----|---|-----|-----|----|-------------|
| 716 | 19        | hc | 1 | MOL | H19 | 19 | 0.00074076  |
| 717 | 1.007941  |    |   |     |     |    |             |
| 718 | 20        | c3 | 1 | MOL | C20 | 20 | -0.24854561 |
| 719 | 12.010736 |    |   |     |     |    |             |
| 720 | 21        | hc | 1 | MOL | H21 | 21 | -0.02234380 |
| 721 | 1.007941  |    |   |     |     |    |             |
| 722 | 22        | hc | 1 | MOL | H22 | 22 | -0.02234380 |
| 723 | 1.007941  |    |   |     |     |    |             |
| 724 | 23        | hc | 1 | MOL | H23 | 23 | 0.05305333  |
| 725 | 1.007941  |    |   |     |     |    |             |
| 726 | 24        | hc | 1 | MOL | H24 | 24 | 0.05305333  |
| 727 | 1.007941  |    |   |     |     |    |             |
| 728 | 25        | hc | 1 | MOL | H25 | 25 | 0.05305333  |
| 729 | 1.007941  |    |   |     |     |    |             |
| 730 | 26        | s6 | 1 | MOL | S26 | 26 | 0.88463518  |
| 731 | 32.064787 |    |   |     |     |    |             |
| 732 | 27        | o  | 1 | MOL | O27 | 27 | -0.60431712 |
| 733 | 15.999405 |    |   |     |     |    |             |
| 734 | 28        | o  | 1 | MOL | O28 | 28 | -0.59713493 |
| 735 | 15.999405 |    |   |     |     |    |             |
| 736 | 29        | o  | 1 | MOL | O29 | 29 | -0.59715738 |
| 737 | 15.999405 |    |   |     |     |    |             |

---

738

739 [ bonds ]

740 ; atom\_i atom\_j functype r0 (nm) k (kJ/mol/nm<sup>2</sup>)

741 1 2 1 0.152563 2.663415E+05 ; C1-C2, DRIH

742 method

743 1 3 1 0.109562 3.141027E+05 ; C1-H3, DRIH

744 method

745 1 4 1 0.109562 3.141012E+05 ; C1-H4, DRIH

746 method

747 1 26 1 0.183645 1.681734E+05 ; C1-S26, DRIH

748 method

749 2 5 1 0.153412 2.567887E+05 ; C2-C5, DRIH

750 method

751 2 6 1 0.109679 3.123618E+05 ; C2-H6, DRIH

752 method

753 2 7 1 0.109679 3.123621E+05 ; C2-H7, DRIH

754 method

755 5 8 1 0.153427 2.578053E+05 ; C5-C8, DRIH

756 method

757 5 9 1 0.110045 3.026487E+05 ; C5-H9, DRIH

758 method

759 5 10 1 0.110045 3.026476E+05 ; C5-H10, DRIH



---

|     |        |    |   |          |              |                 |  |
|-----|--------|----|---|----------|--------------|-----------------|--|
| 760 | method |    |   |          |              |                 |  |
| 761 | 8      | 11 | 1 | 0.109946 | 3.053144E+05 | ; C8-H11, DRIH  |  |
| 762 | method |    |   |          |              |                 |  |
| 763 | 8      | 12 | 1 | 0.109946 | 3.053133E+05 | ; C8-H12, DRIH  |  |
| 764 | method |    |   |          |              |                 |  |
| 765 | 8      | 13 | 1 | 0.153380 | 2.585967E+05 | ; C8-C13, DRIH  |  |
| 766 | method |    |   |          |              |                 |  |
| 767 | 13     | 14 | 1 | 0.153364 | 2.591292E+05 | ; C13-C14, DRIH |  |
| 768 | method |    |   |          |              |                 |  |
| 769 | 13     | 15 | 1 | 0.109994 | 3.040938E+05 | ; C13-H15, DRIH |  |
| 770 | method |    |   |          |              |                 |  |
| 771 | 13     | 16 | 1 | 0.109994 | 3.040940E+05 | ; C13-H16, DRIH |  |
| 772 | method |    |   |          |              |                 |  |
| 773 | 14     | 17 | 1 | 0.153371 | 2.594715E+05 | ; C14-C17, DRIH |  |
| 774 | method |    |   |          |              |                 |  |
| 775 | 14     | 18 | 1 | 0.109973 | 3.047853E+05 | ; C14-H18, DRIH |  |
| 776 | method |    |   |          |              |                 |  |
| 777 | 14     | 19 | 1 | 0.109973 | 3.047859E+05 | ; C14-H19, DRIH |  |
| 778 | method |    |   |          |              |                 |  |
| 779 | 17     | 20 | 1 | 0.153195 | 2.640275E+05 | ; C17-C20, DRIH |  |
| 780 | method |    |   |          |              |                 |  |
| 781 | 17     | 21 | 1 | 0.109882 | 3.064708E+05 | ; C17-H21, DRIH |  |

---

782 method

783 17 22 1 0.109881 3.064727E+05 ; C17-H22, DRIH

784 method

785 20 23 1 0.109572 3.150316E+05 ; C20-H23, DRIH

786 method

787 20 24 1 0.109626 3.145204E+05 ; C20-H24, DRIH

788 method

789 20 25 1 0.109626 3.145190E+05 ; C20-H25, DRIH

790 method

791 26 27 1 0.148967 4.943792E+05 ; S26-O27, DRIH

792 method

793 26 28 1 0.149223 4.858050E+05 ; S26-O28, DRIH

794 method

795 26 29 1 0.149222 4.858186E+05 ; S26-O29, DRIH

796 method

797

798 [ angles ]

799 ; atom\_i atom\_j atom\_k functype a0 (Deg.) k (kJ/mol/rad^2)

800 2 1 3 1 111.382 1.109620E+02 ; C2-

801 C1-H3, DRIH method

802 2 1 4 1 111.381 1.109576E+02 ; C2-

803 C1-H4, DRIH method

---

|     |                     |   |    |   |         |              |       |
|-----|---------------------|---|----|---|---------|--------------|-------|
| 804 | 2                   | 1 | 26 | 1 | 112.467 | 3.395122E+02 | ; C2- |
| 805 | C1-S26, DRIH method |   |    |   |         |              |       |
| 806 | 3                   | 1 | 4  | 1 | 108.118 | 4.665041E+01 | ; H3- |
| 807 | C1-H4, DRIH method  |   |    |   |         |              |       |
| 808 | 3                   | 1 | 26 | 1 | 106.605 | 1.163372E+02 | ; H3- |
| 809 | C1-S26, DRIH method |   |    |   |         |              |       |
| 810 | 4                   | 1 | 26 | 1 | 106.604 | 1.163318E+02 | ; H4- |
| 811 | C1-S26, DRIH method |   |    |   |         |              |       |
| 812 | 1                   | 2 | 5  | 1 | 113.765 | 3.312877E+02 | ; C1- |
| 813 | C2-C5, DRIH method  |   |    |   |         |              |       |
| 814 | 1                   | 2 | 6  | 1 | 108.132 | 1.293415E+02 | ; C1- |
| 815 | C2-H6, DRIH method  |   |    |   |         |              |       |
| 816 | 1                   | 2 | 7  | 1 | 108.130 | 1.293380E+02 | ; C1- |
| 817 | C2-H7, DRIH method  |   |    |   |         |              |       |
| 818 | 5                   | 2 | 6  | 1 | 110.060 | 1.225712E+02 | ; C5- |
| 819 | C2-H6, DRIH method  |   |    |   |         |              |       |
| 820 | 5                   | 2 | 7  | 1 | 110.059 | 1.225671E+02 | ; C5- |
| 821 | C2-H7, DRIH method  |   |    |   |         |              |       |
| 822 | 6                   | 2 | 7  | 1 | 106.407 | 4.794074E+01 | ; H6- |
| 823 | C2-H7, DRIH method  |   |    |   |         |              |       |
| 824 | 2                   | 5 | 8  | 1 | 113.418 | 3.340161E+02 | ; C2- |
| 825 | C5-C8, DRIH method  |   |    |   |         |              |       |

---

|     |                     |   |    |   |         |              |        |
|-----|---------------------|---|----|---|---------|--------------|--------|
| 826 | 2                   | 5 | 9  | 1 | 109.566 | 1.254069E+02 | ; C2-  |
| 827 | C5-H9, DRIH method  |   |    |   |         |              |        |
| 828 | 2                   | 5 | 10 | 1 | 109.566 | 1.254090E+02 | ; C2-  |
| 829 | C5-H10, DRIH method |   |    |   |         |              |        |
| 830 | 8                   | 5 | 9  | 1 | 109.090 | 1.278591E+02 | ; C8-  |
| 831 | C5-H9, DRIH method  |   |    |   |         |              |        |
| 832 | 8                   | 5 | 10 | 1 | 109.090 | 1.278600E+02 | ; C8-  |
| 833 | C5-H10, DRIH method |   |    |   |         |              |        |
| 834 | 9                   | 5 | 10 | 1 | 105.829 | 4.777833E+01 | ; H9-  |
| 835 | C5-H10, DRIH method |   |    |   |         |              |        |
| 836 | 5                   | 8 | 11 | 1 | 109.141 | 1.274413E+02 | ; C5-  |
| 837 | C8-H11, DRIH method |   |    |   |         |              |        |
| 838 | 5                   | 8 | 12 | 1 | 109.141 | 1.274388E+02 | ; C5-  |
| 839 | C8-H12, DRIH method |   |    |   |         |              |        |
| 840 | 5                   | 8 | 13 | 1 | 113.914 | 3.385019E+02 | ; C5-  |
| 841 | C8-C13, DRIH method |   |    |   |         |              |        |
| 842 | 11                  | 8 | 12 | 1 | 105.816 | 4.761773E+01 | ; H11- |
| 843 | C8-H12, DRIH method |   |    |   |         |              |        |
| 844 | 11                  | 8 | 13 | 1 | 109.257 | 1.283781E+02 | ; H11- |
| 845 | C8-C13, DRIH method |   |    |   |         |              |        |
| 846 | 12                  | 8 | 13 | 1 | 109.256 | 1.283781E+02 | ; H12- |
| 847 | C8-C13, DRIH method |   |    |   |         |              |        |

---

|     |                      |    |    |   |         |              |        |
|-----|----------------------|----|----|---|---------|--------------|--------|
| 848 | 8                    | 13 | 14 | 1 | 113.802 | 3.392823E+02 | ; C8-  |
| 849 | C13-C14, DRIH method |    |    |   |         |              |        |
| 850 | 8                    | 13 | 15 | 1 | 109.275 | 1.276770E+02 | ; C8-  |
| 851 | C13-H15, DRIH method |    |    |   |         |              |        |
| 852 | 8                    | 13 | 16 | 1 | 109.275 | 1.276711E+02 | ; C8-  |
| 853 | C13-H16, DRIH method |    |    |   |         |              |        |
| 854 | 14                   | 13 | 15 | 1 | 109.176 | 1.282535E+02 | ; C14- |
| 855 | C13-H15, DRIH method |    |    |   |         |              |        |
| 856 | 14                   | 13 | 16 | 1 | 109.176 | 1.282552E+02 | ; C14- |
| 857 | C13-H16, DRIH method |    |    |   |         |              |        |
| 858 | 15                   | 13 | 16 | 1 | 105.831 | 4.767793E+01 | ; H15- |
| 859 | C13-H16, DRIH method |    |    |   |         |              |        |
| 860 | 13                   | 14 | 17 | 1 | 113.823 | 3.394577E+02 | ; C13- |
| 861 | C14-C17, DRIH method |    |    |   |         |              |        |
| 862 | 13                   | 14 | 18 | 1 | 109.291 | 1.275907E+02 | ; C13- |
| 863 | C14-H18, DRIH method |    |    |   |         |              |        |
| 864 | 13                   | 14 | 19 | 1 | 109.290 | 1.275847E+02 | ; C13- |
| 865 | C14-H19, DRIH method |    |    |   |         |              |        |
| 866 | 17                   | 14 | 18 | 1 | 109.154 | 1.286192E+02 | ; C17- |
| 867 | C14-H18, DRIH method |    |    |   |         |              |        |
| 868 | 17                   | 14 | 19 | 1 | 109.154 | 1.286182E+02 | ; C17- |
| 869 | C14-H19, DRIH method |    |    |   |         |              |        |

---

|     |                      |    |    |   |         |              |        |
|-----|----------------------|----|----|---|---------|--------------|--------|
| 870 | 18                   | 14 | 19 | 1 | 105.820 | 4.770128E+01 | ; H18- |
| 871 | C14-H19, DRIH method |    |    |   |         |              |        |
| 872 | 14                   | 17 | 20 | 1 | 113.408 | 3.429247E+02 | ; C14- |
| 873 | C17-C20, DRIH method |    |    |   |         |              |        |
| 874 | 14                   | 17 | 21 | 1 | 109.204 | 1.279241E+02 | ; C14- |
| 875 | C17-H21, DRIH method |    |    |   |         |              |        |
| 876 | 14                   | 17 | 22 | 1 | 109.204 | 1.279260E+02 | ; C14- |
| 877 | C17-H22, DRIH method |    |    |   |         |              |        |
| 878 | 20                   | 17 | 21 | 1 | 109.430 | 1.275658E+02 | ; C20- |
| 879 | C17-H21, DRIH method |    |    |   |         |              |        |
| 880 | 20                   | 17 | 22 | 1 | 109.430 | 1.275648E+02 | ; C20- |
| 881 | C17-H22, DRIH method |    |    |   |         |              |        |
| 882 | 21                   | 17 | 22 | 1 | 105.890 | 4.801252E+01 | ; H21- |
| 883 | C17-H22, DRIH method |    |    |   |         |              |        |
| 884 | 17                   | 20 | 23 | 1 | 111.707 | 2.637665E+02 | ; C17- |
| 885 | C20-H23, DRIH method |    |    |   |         |              |        |
| 886 | 17                   | 20 | 24 | 1 | 111.134 | 2.699589E+02 | ; C17- |
| 887 | C20-H24, DRIH method |    |    |   |         |              |        |
| 888 | 17                   | 20 | 25 | 1 | 111.134 | 2.699478E+02 | ; C17- |
| 889 | C20-H25, DRIH method |    |    |   |         |              |        |
| 890 | 23                   | 20 | 24 | 1 | 107.660 | 1.369120E+02 | ; H23- |
| 891 | C20-H24, DRIH method |    |    |   |         |              |        |

|     |                                   |        |        |          |            |              |                 |
|-----|-----------------------------------|--------|--------|----------|------------|--------------|-----------------|
| 892 | 23                                | 20     | 25     | 1        | 107.660    | 1.369107E+02 | ; H23-          |
| 893 | C20-H25, DRIH method              |        |        |          |            |              |                 |
| 894 | 24                                | 20     | 25     | 1        | 107.344    | 1.364444E+02 | ; H24-          |
| 895 | C20-H25, DRIH method              |        |        |          |            |              |                 |
| 896 | 1                                 | 26     | 27     | 1        | 103.715    | 6.546967E+02 | ; C1-           |
| 897 | S26-O27, DRIH method              |        |        |          |            |              |                 |
| 898 | 1                                 | 26     | 28     | 1        | 104.049    | 6.816576E+02 | ; C1-           |
| 899 | S26-O28, DRIH method              |        |        |          |            |              |                 |
| 900 | 1                                 | 26     | 29     | 1        | 104.050    | 6.816158E+02 | ; C1-           |
| 901 | S26-O29, DRIH method              |        |        |          |            |              |                 |
| 902 | 27                                | 26     | 28     | 1        | 114.467    | 3.035863E+02 | ; O27-          |
| 903 | S26-O28, DRIH method              |        |        |          |            |              |                 |
| 904 | 27                                | 26     | 29     | 1        | 114.467    | 3.035918E+02 | ; O27-          |
| 905 | S26-O29, DRIH method              |        |        |          |            |              |                 |
| 906 | 28                                | 26     | 29     | 1        | 114.242    | 3.059318E+02 | ; O28-          |
| 907 | S26-O29, DRIH method              |        |        |          |            |              |                 |
| 908 |                                   |        |        |          |            |              |                 |
| 909 | [ angles ] ; bond-bond cross term |        |        |          |            |              |                 |
| 910 | ; atom_i                          | atom_j | atom_k | functype | r0_ij (nm) | r0_jk (nm)   | k (kJ/mol/nm^2) |
| 911 | 2                                 | 1      | 3      | 3        | 0.152563   | 0.109562     | 4.851409E+03    |
| 912 | ; C2-C1-H3                        |        |        |          |            |              |                 |
| 913 | 2                                 | 1      | 4      | 3        | 0.152563   | 0.109562     | 4.851491E+03    |

---

|     |             |   |    |   |          |          |              |
|-----|-------------|---|----|---|----------|----------|--------------|
| 914 | ; C2-C1-H4  |   |    |   |          |          |              |
| 915 | 2           | 1 | 26 | 3 | 0.152563 | 0.183645 | 9.986385E+03 |
| 916 | ; C2-C1-S26 |   |    |   |          |          |              |
| 917 | 3           | 1 | 4  | 3 | 0.109562 | 0.109562 | 1.999650E+03 |
| 918 | ; H3-C1-H4  |   |    |   |          |          |              |
| 919 | 3           | 1 | 26 | 3 | 0.109562 | 0.183645 | 9.320733E+02 |
| 920 | ; H3-C1-S26 |   |    |   |          |          |              |
| 921 | 4           | 1 | 26 | 3 | 0.109562 | 0.183645 | 9.319382E+02 |
| 922 | ; H4-C1-S26 |   |    |   |          |          |              |
| 923 | 1           | 2 | 5  | 3 | 0.152563 | 0.153412 | 8.765801E+03 |
| 924 | ; C1-C2-C5  |   |    |   |          |          |              |
| 925 | 1           | 2 | 6  | 3 | 0.152563 | 0.109679 | 5.863601E+03 |
| 926 | ; C1-C2-H6  |   |    |   |          |          |              |
| 927 | 1           | 2 | 7  | 3 | 0.152563 | 0.109679 | 5.864288E+03 |
| 928 | ; C1-C2-H7  |   |    |   |          |          |              |
| 929 | 5           | 2 | 6  | 3 | 0.153412 | 0.109679 | 4.847278E+03 |
| 930 | ; C5-C2-H6  |   |    |   |          |          |              |
| 931 | 5           | 2 | 7  | 3 | 0.153412 | 0.109679 | 4.847513E+03 |
| 932 | ; C5-C2-H7  |   |    |   |          |          |              |
| 933 | 6           | 2 | 7  | 3 | 0.109679 | 0.109679 | 2.541394E+03 |
| 934 | ; H6-C2-H7  |   |    |   |          |          |              |
| 935 | 2           | 5 | 8  | 3 | 0.153412 | 0.153427 | 8.713447E+03 |



---

|     |              |   |    |   |          |          |              |
|-----|--------------|---|----|---|----------|----------|--------------|
| 936 | ; C2-C5-C8   |   |    |   |          |          |              |
| 937 | 2            | 5 | 9  | 3 | 0.153412 | 0.110045 | 5.950534E+03 |
| 938 | ; C2-C5-H9   |   |    |   |          |          |              |
| 939 | 2            | 5 | 10 | 3 | 0.153412 | 0.110045 | 5.950933E+03 |
| 940 | ; C2-C5-H10  |   |    |   |          |          |              |
| 941 | 8            | 5 | 9  | 3 | 0.153427 | 0.110045 | 5.315236E+03 |
| 942 | ; C8-C5-H9   |   |    |   |          |          |              |
| 943 | 8            | 5 | 10 | 3 | 0.153427 | 0.110045 | 5.315521E+03 |
| 944 | ; C8-C5-H10  |   |    |   |          |          |              |
| 945 | 9            | 5 | 10 | 3 | 0.110045 | 0.110045 | 3.218401E+03 |
| 946 | ; H9-C5-H10  |   |    |   |          |          |              |
| 947 | 5            | 8 | 11 | 3 | 0.153427 | 0.109946 | 5.492264E+03 |
| 948 | ; C5-C8-H11  |   |    |   |          |          |              |
| 949 | 5            | 8 | 12 | 3 | 0.153427 | 0.109946 | 5.492059E+03 |
| 950 | ; C5-C8-H12  |   |    |   |          |          |              |
| 951 | 5            | 8 | 13 | 3 | 0.153427 | 0.153380 | 8.522585E+03 |
| 952 | ; C5-C8-C13  |   |    |   |          |          |              |
| 953 | 11           | 8 | 12 | 3 | 0.109946 | 0.109946 | 3.036735E+03 |
| 954 | ; H11-C8-H12 |   |    |   |          |          |              |
| 955 | 11           | 8 | 13 | 3 | 0.109946 | 0.153380 | 5.259223E+03 |
| 956 | ; H11-C8-C13 |   |    |   |          |          |              |
| 957 | 12           | 8 | 13 | 3 | 0.109946 | 0.153380 | 5.259897E+03 |

---

|     |               |    |    |   |          |          |              |
|-----|---------------|----|----|---|----------|----------|--------------|
| 958 | ; H12-C8-C13  |    |    |   |          |          |              |
| 959 | 8             | 13 | 14 | 3 | 0.153380 | 0.153364 | 8.560891E+03 |
| 960 | ; C8-C13-C14  |    |    |   |          |          |              |
| 961 | 8             | 13 | 15 | 3 | 0.153380 | 0.109994 | 5.628965E+03 |
| 962 | ; C8-C13-H15  |    |    |   |          |          |              |
| 963 | 8             | 13 | 16 | 3 | 0.153380 | 0.109994 | 5.629309E+03 |
| 964 | ; C8-C13-H16  |    |    |   |          |          |              |
| 965 | 14            | 13 | 15 | 3 | 0.153364 | 0.109994 | 5.336049E+03 |
| 966 | ; C14-C13-H15 |    |    |   |          |          |              |
| 967 | 14            | 13 | 16 | 3 | 0.153364 | 0.109994 | 5.335599E+03 |
| 968 | ; C14-C13-H16 |    |    |   |          |          |              |
| 969 | 15            | 13 | 16 | 3 | 0.109994 | 0.109994 | 3.096432E+03 |
| 970 | ; H15-C13-H16 |    |    |   |          |          |              |
| 971 | 13            | 14 | 17 | 3 | 0.153364 | 0.153371 | 8.488262E+03 |
| 972 | ; C13-C14-C17 |    |    |   |          |          |              |
| 973 | 13            | 14 | 18 | 3 | 0.153364 | 0.109973 | 5.478890E+03 |
| 974 | ; C13-C14-H18 |    |    |   |          |          |              |
| 975 | 13            | 14 | 19 | 3 | 0.153364 | 0.109973 | 5.478517E+03 |
| 976 | ; C13-C14-H19 |    |    |   |          |          |              |
| 977 | 17            | 14 | 18 | 3 | 0.153371 | 0.109973 | 5.363622E+03 |
| 978 | ; C17-C14-H18 |    |    |   |          |          |              |
| 979 | 17            | 14 | 19 | 3 | 0.153371 | 0.109973 | 5.363893E+03 |

---

|      |               |    |    |   |          |          |              |
|------|---------------|----|----|---|----------|----------|--------------|
| 980  | ; C17-C14-H19 |    |    |   |          |          |              |
| 981  | 18            | 14 | 19 | 3 | 0.109973 | 0.109973 | 3.049275E+03 |
| 982  | ; H18-C14-H19 |    |    |   |          |          |              |
| 983  | 14            | 17 | 20 | 3 | 0.153371 | 0.153195 | 8.388200E+03 |
| 984  | ; C14-C17-C20 |    |    |   |          |          |              |
| 985  | 14            | 17 | 21 | 3 | 0.153371 | 0.109882 | 5.745327E+03 |
| 986  | ; C14-C17-H21 |    |    |   |          |          |              |
| 987  | 14            | 17 | 22 | 3 | 0.153371 | 0.109881 | 5.744770E+03 |
| 988  | ; C14-C17-H22 |    |    |   |          |          |              |
| 989  | 20            | 17 | 21 | 3 | 0.153195 | 0.109882 | 5.298304E+03 |
| 990  | ; C20-C17-H21 |    |    |   |          |          |              |
| 991  | 20            | 17 | 22 | 3 | 0.153195 | 0.109881 | 5.298487E+03 |
| 992  | ; C20-C17-H22 |    |    |   |          |          |              |
| 993  | 21            | 17 | 22 | 3 | 0.109882 | 0.109881 | 3.188155E+03 |
| 994  | ; H21-C17-H22 |    |    |   |          |          |              |
| 995  | 17            | 20 | 23 | 3 | 0.153195 | 0.109572 | 4.779416E+03 |
| 996  | ; C17-C20-H23 |    |    |   |          |          |              |
| 997  | 17            | 20 | 24 | 3 | 0.153195 | 0.109626 | 5.575009E+03 |
| 998  | ; C17-C20-H24 |    |    |   |          |          |              |
| 999  | 17            | 20 | 25 | 3 | 0.153195 | 0.109626 | 5.575191E+03 |
| 1000 | ; C17-C20-H25 |    |    |   |          |          |              |
| 1001 | 23            | 20 | 24 | 3 | 0.109572 | 0.109626 | 2.490924E+03 |

---

1002 ; H23-C20-H24

1003 23 20 25 3 0.109572 0.109626 2.490950E+03

1004 ; H23-C20-H25

1005 24 20 25 3 0.109626 0.109626 2.501880E+03

1006 ; H24-C20-H25

1007 1 26 27 3 0.183645 0.148967 8.293024E+03

1008 ; C1-S26-O27

1009 1 26 28 3 0.183645 0.149223 9.374970E+03

1010 ; C1-S26-O28

1011 1 26 29 3 0.183645 0.149222 9.374324E+03

1012 ; C1-S26-O29

1013 27 26 28 3 0.148967 0.149223 7.346307E+03

1014 ; O27-S26-O28

1015 27 26 29 3 0.148967 0.149222 7.346687E+03

1016 ; O27-S26-O29

1017 28 26 29 3 0.149223 0.149222 8.129384E+03

1018 ; O28-S26-O29

1019

1020 [ dihedrals ] ; propers

1021 ; atom\_i atom\_j atom\_k atom\_l functype d0 (Deg.) k (kJ/mol/rad^2) ; Case

1022 of functype=2

1023 ; atom\_i atom\_j atom\_k atom\_l functype phase (Deg.) kd (kJ/mol) pn ; Case

---

|      |                            |   |    |    |   |          |              |   |  |
|------|----------------------------|---|----|----|---|----------|--------------|---|--|
| 1024 | of functype=9              |   |    |    |   |          |              |   |  |
| 1025 | 1                          | 2 | 5  | 8  | 2 | 179.999  | 3.672017E+01 | ; |  |
| 1026 | C1-C2-C5-C8, DRIH method   |   |    |    |   |          |              |   |  |
| 1027 | 1                          | 2 | 5  | 9  | 2 | -57.848  | 3.728205E+01 | ; |  |
| 1028 | C1-C2-C5-H9, DRIH method   |   |    |    |   |          |              |   |  |
| 1029 | 1                          | 2 | 5  | 10 | 2 | 57.845   | 3.728168E+01 | ; |  |
| 1030 | C1-C2-C5-H10, DRIH method  |   |    |    |   |          |              |   |  |
| 1031 | 2                          | 1 | 26 | 27 | 2 | 179.998  | 6.924459E+01 | ; |  |
| 1032 | C2-C1-S26-O27, DRIH method |   |    |    |   |          |              |   |  |
| 1033 | 2                          | 1 | 26 | 28 | 2 | -59.967  | 6.745119E+01 | ; |  |
| 1034 | C2-C1-S26-O28, DRIH method |   |    |    |   |          |              |   |  |
| 1035 | 2                          | 1 | 26 | 29 | 2 | 59.962   | 6.744855E+01 | ; |  |
| 1036 | C2-C1-S26-O29, DRIH method |   |    |    |   |          |              |   |  |
| 1037 | 2                          | 5 | 8  | 11 | 2 | -57.594  | 3.654782E+01 | ; |  |
| 1038 | C2-C5-C8-H11, DRIH method  |   |    |    |   |          |              |   |  |
| 1039 | 2                          | 5 | 8  | 12 | 2 | 57.611   | 3.654732E+01 | ; |  |
| 1040 | C2-C5-C8-H12, DRIH method  |   |    |    |   |          |              |   |  |
| 1041 | 2                          | 5 | 8  | 13 | 2 | -179.992 | 3.563625E+01 | ; |  |
| 1042 | C2-C5-C8-C13, DRIH method  |   |    |    |   |          |              |   |  |
| 1043 | 3                          | 1 | 2  | 5  | 2 | -60.400  | 3.451001E+01 | ; |  |
| 1044 | H3-C1-C2-C5, DRIH method   |   |    |    |   |          |              |   |  |
| 1045 | 3                          | 1 | 2  | 6  | 2 | 62.185   | 3.899513E+01 | ; |  |

---

|      |                            |   |    |    |   |          |              |   |  |
|------|----------------------------|---|----|----|---|----------|--------------|---|--|
| 1046 | H3-C1-C2-H6, DRIH method   |   |    |    |   |          |              |   |  |
| 1047 | 3                          | 1 | 2  | 7  | 2 | 177.017  | 3.597336E+01 | ; |  |
| 1048 | H3-C1-C2-H7, DRIH method   |   |    |    |   |          |              |   |  |
| 1049 | 3                          | 1 | 26 | 27 | 2 | 57.653   | 6.767273E+01 | ; |  |
| 1050 | H3-C1-S26-O27, DRIH method |   |    |    |   |          |              |   |  |
| 1051 | 3                          | 1 | 26 | 28 | 2 | 177.689  | 6.694277E+01 | ; |  |
| 1052 | H3-C1-S26-O28, DRIH method |   |    |    |   |          |              |   |  |
| 1053 | 3                          | 1 | 26 | 29 | 2 | -62.383  | 7.089335E+01 | ; |  |
| 1054 | H3-C1-S26-O29, DRIH method |   |    |    |   |          |              |   |  |
| 1055 | 4                          | 1 | 2  | 5  | 2 | 60.393   | 3.451041E+01 | ; |  |
| 1056 | H4-C1-C2-C5, DRIH method   |   |    |    |   |          |              |   |  |
| 1057 | 4                          | 1 | 2  | 6  | 2 | -177.023 | 3.597248E+01 | ; |  |
| 1058 | H4-C1-C2-H6, DRIH method   |   |    |    |   |          |              |   |  |
| 1059 | 4                          | 1 | 2  | 7  | 2 | -62.190  | 3.899662E+01 | ; |  |
| 1060 | H4-C1-C2-H7, DRIH method   |   |    |    |   |          |              |   |  |
| 1061 | 4                          | 1 | 26 | 27 | 2 | -57.660  | 6.767288E+01 | ; |  |
| 1062 | H4-C1-S26-O27, DRIH method |   |    |    |   |          |              |   |  |
| 1063 | 4                          | 1 | 26 | 28 | 2 | 62.376   | 7.089472E+01 | ; |  |
| 1064 | H4-C1-S26-O28, DRIH method |   |    |    |   |          |              |   |  |
| 1065 | 4                          | 1 | 26 | 29 | 2 | -177.695 | 6.694288E+01 | ; |  |
| 1066 | H4-C1-S26-O29, DRIH method |   |    |    |   |          |              |   |  |
| 1067 | 5                          | 2 | 1  | 26 | 2 | 179.995  | 3.314755E+01 | ; |  |

---

|      |                            |   |    |    |   |          |              |   |
|------|----------------------------|---|----|----|---|----------|--------------|---|
| 1068 | C5-C2-C1-S26, DRIH method  |   |    |    |   |          |              |   |
| 1069 | 5                          | 8 | 13 | 14 | 2 | -179.997 | 3.612331E+01 | ; |
| 1070 | C5-C8-C13-C14, DRIH method |   |    |    |   |          |              |   |
| 1071 | 5                          | 8 | 13 | 15 | 2 | 57.687   | 3.670647E+01 | ; |
| 1072 | C5-C8-C13-H15, DRIH method |   |    |    |   |          |              |   |
| 1073 | 5                          | 8 | 13 | 16 | 2 | -57.682  | 3.670731E+01 | ; |
| 1074 | C5-C8-C13-H16, DRIH method |   |    |    |   |          |              |   |
| 1075 | 6                          | 2 | 1  | 26 | 2 | -57.420  | 3.456126E+01 | ; |
| 1076 | H6-C2-C1-S26, DRIH method  |   |    |    |   |          |              |   |
| 1077 | 6                          | 2 | 5  | 8  | 2 | 58.480   | 3.684414E+01 | ; |
| 1078 | H6-C2-C5-C8, DRIH method   |   |    |    |   |          |              |   |
| 1079 | 6                          | 2 | 5  | 9  | 2 | -179.367 | 3.766193E+01 | ; |
| 1080 | H6-C2-C5-H9, DRIH method   |   |    |    |   |          |              |   |
| 1081 | 6                          | 2 | 5  | 10 | 2 | -63.674  | 4.034372E+01 | ; |
| 1082 | H6-C2-C5-H10, DRIH method  |   |    |    |   |          |              |   |
| 1083 | 7                          | 2 | 1  | 26 | 2 | 57.412   | 3.456347E+01 | ; |
| 1084 | H7-C2-C1-S26, DRIH method  |   |    |    |   |          |              |   |
| 1085 | 7                          | 2 | 5  | 8  | 2 | -58.485  | 3.684387E+01 | ; |
| 1086 | H7-C2-C5-C8, DRIH method   |   |    |    |   |          |              |   |
| 1087 | 7                          | 2 | 5  | 9  | 2 | 63.668   | 4.034402E+01 | ; |
| 1088 | H7-C2-C5-H9, DRIH method   |   |    |    |   |          |              |   |
| 1089 | 7                          | 2 | 5  | 10 | 2 | 179.361  | 3.766201E+01 | ; |

---

|      |                             |    |    |    |   |          |              |   |
|------|-----------------------------|----|----|----|---|----------|--------------|---|
| 1090 | H7-C2-C5-H10, DRIH method   |    |    |    |   |          |              |   |
| 1091 | 8                           | 13 | 14 | 17 | 2 | -179.984 | 3.534660E+01 | ; |
| 1092 | C8-C13-C14-C17, DRIH method |    |    |    |   |          |              |   |
| 1093 | 8                           | 13 | 14 | 18 | 2 | -57.671  | 3.674790E+01 | ; |
| 1094 | C8-C13-C14-H18, DRIH method |    |    |    |   |          |              |   |
| 1095 | 8                           | 13 | 14 | 19 | 2 | 57.703   | 3.674748E+01 | ; |
| 1096 | C8-C13-C14-H19, DRIH method |    |    |    |   |          |              |   |
| 1097 | 9                           | 5  | 8  | 11 | 2 | 179.989  | 3.744211E+01 | ; |
| 1098 | H9-C5-C8-H11, DRIH method   |    |    |    |   |          |              |   |
| 1099 | 9                           | 5  | 8  | 12 | 2 | -64.806  | 4.011089E+01 | ; |
| 1100 | H9-C5-C8-H12, DRIH method   |    |    |    |   |          |              |   |
| 1101 | 9                           | 5  | 8  | 13 | 2 | 57.591   | 3.663112E+01 | ; |
| 1102 | H9-C5-C8-C13, DRIH method   |    |    |    |   |          |              |   |
| 1103 | 10                          | 5  | 8  | 11 | 2 | 64.824   | 4.011165E+01 | ; |
| 1104 | H10-C5-C8-H11, DRIH method  |    |    |    |   |          |              |   |
| 1105 | 10                          | 5  | 8  | 12 | 2 | -179.971 | 3.744216E+01 | ; |
| 1106 | H10-C5-C8-H12, DRIH method  |    |    |    |   |          |              |   |
| 1107 | 10                          | 5  | 8  | 13 | 2 | -57.574  | 3.663149E+01 | ; |
| 1108 | H10-C5-C8-C13, DRIH method  |    |    |    |   |          |              |   |
| 1109 | 11                          | 8  | 13 | 14 | 2 | 57.669   | 3.673859E+01 | ; |
| 1110 | H11-C8-C13-C14, DRIH method |    |    |    |   |          |              |   |
| 1111 | 11                          | 8  | 13 | 15 | 2 | -64.647  | 4.013621E+01 | ; |



---

|      |                              |    |    |    |   |          |              |   |  |
|------|------------------------------|----|----|----|---|----------|--------------|---|--|
| 1112 | H11-C8-C13-H15, DRIH method  |    |    |    |   |          |              |   |  |
| 1113 | 11                           | 8  | 13 | 16 | 2 | 179.984  | 3.760226E+01 | ; |  |
| 1114 | H11-C8-C13-H16, DRIH method  |    |    |    |   |          |              |   |  |
| 1115 | 12                           | 8  | 13 | 14 | 2 | -57.663  | 3.673762E+01 | ; |  |
| 1116 | H12-C8-C13-C14, DRIH method  |    |    |    |   |          |              |   |  |
| 1117 | 12                           | 8  | 13 | 15 | 2 | -179.979 | 3.760154E+01 | ; |  |
| 1118 | H12-C8-C13-H15, DRIH method  |    |    |    |   |          |              |   |  |
| 1119 | 12                           | 8  | 13 | 16 | 2 | 64.652   | 4.013684E+01 | ; |  |
| 1120 | H12-C8-C13-H16, DRIH method  |    |    |    |   |          |              |   |  |
| 1121 | 13                           | 14 | 17 | 20 | 2 | -179.997 | 3.601719E+01 | ; |  |
| 1122 | C13-C14-C17-C20, DRIH method |    |    |    |   |          |              |   |  |
| 1123 | 13                           | 14 | 17 | 21 | 2 | -57.678  | 3.673575E+01 | ; |  |
| 1124 | C13-C14-C17-H21, DRIH method |    |    |    |   |          |              |   |  |
| 1125 | 13                           | 14 | 17 | 22 | 2 | 57.684   | 3.673428E+01 | ; |  |
| 1126 | C13-C14-C17-H22, DRIH method |    |    |    |   |          |              |   |  |
| 1127 | 14                           | 17 | 20 | 23 | 2 | -179.996 | 3.685649E+01 | ; |  |
| 1128 | C14-C17-C20-H23, DRIH method |    |    |    |   |          |              |   |  |
| 1129 | 14                           | 17 | 20 | 24 | 2 | -59.735  | 3.639392E+01 | ; |  |
| 1130 | C14-C17-C20-H24, DRIH method |    |    |    |   |          |              |   |  |
| 1131 | 14                           | 17 | 20 | 25 | 2 | 59.742   | 3.639223E+01 | ; |  |
| 1132 | C14-C17-C20-H25, DRIH method |    |    |    |   |          |              |   |  |
| 1133 | 15                           | 13 | 14 | 17 | 2 | -57.614  | 3.654973E+01 | ; |  |

---

|      |                              |    |    |    |   |          |              |   |
|------|------------------------------|----|----|----|---|----------|--------------|---|
| 1134 | H15-C13-C14-C17, DRIH method |    |    |    |   |          |              |   |
| 1135 | 15                           | 13 | 14 | 18 | 2 | 64.700   | 4.020571E+01 | ; |
| 1136 | H15-C13-C14-H18, DRIH method |    |    |    |   |          |              |   |
| 1137 | 15                           | 13 | 14 | 19 | 2 | -179.926 | 3.763499E+01 | ; |
| 1138 | H15-C13-C14-H19, DRIH method |    |    |    |   |          |              |   |
| 1139 | 16                           | 13 | 14 | 17 | 2 | 57.647   | 3.654887E+01 | ; |
| 1140 | H16-C13-C14-C17, DRIH method |    |    |    |   |          |              |   |
| 1141 | 16                           | 13 | 14 | 18 | 2 | 179.960  | 3.763483E+01 | ; |
| 1142 | H16-C13-C14-H18, DRIH method |    |    |    |   |          |              |   |
| 1143 | 16                           | 13 | 14 | 19 | 2 | -64.666  | 4.020407E+01 | ; |
| 1144 | H16-C13-C14-H19, DRIH method |    |    |    |   |          |              |   |
| 1145 | 18                           | 14 | 17 | 20 | 2 | 57.615   | 3.687264E+01 | ; |
| 1146 | H18-C14-C17-C20, DRIH method |    |    |    |   |          |              |   |
| 1147 | 18                           | 14 | 17 | 21 | 2 | 179.934  | 3.763414E+01 | ; |
| 1148 | H18-C14-C17-H21, DRIH method |    |    |    |   |          |              |   |
| 1149 | 18                           | 14 | 17 | 22 | 2 | -64.704  | 4.028496E+01 | ; |
| 1150 | H18-C14-C17-H22, DRIH method |    |    |    |   |          |              |   |
| 1151 | 19                           | 14 | 17 | 20 | 2 | -57.609  | 3.687216E+01 | ; |
| 1152 | H19-C14-C17-C20, DRIH method |    |    |    |   |          |              |   |
| 1153 | 19                           | 14 | 17 | 21 | 2 | 64.710   | 4.028563E+01 | ; |
| 1154 | H19-C14-C17-H21, DRIH method |    |    |    |   |          |              |   |
| 1155 | 19                           | 14 | 17 | 22 | 2 | -179.928 | 3.763273E+01 | ; |

---

|      |                              |    |    |    |   |          |              |   |
|------|------------------------------|----|----|----|---|----------|--------------|---|
| 1156 | H19-C14-C17-H22, DRIH method |    |    |    |   |          |              |   |
| 1157 | 21                           | 17 | 20 | 23 | 2 | 57.810   | 3.808950E+01 | ; |
| 1158 | H21-C17-C20-H23, DRIH method |    |    |    |   |          |              |   |
| 1159 | 21                           | 17 | 20 | 24 | 2 | 178.071  | 3.764281E+01 | ; |
| 1160 | H21-C17-C20-H24, DRIH method |    |    |    |   |          |              |   |
| 1161 | 21                           | 17 | 20 | 25 | 2 | -62.451  | 3.989287E+01 | ; |
| 1162 | H21-C17-C20-H25, DRIH method |    |    |    |   |          |              |   |
| 1163 | 22                           | 17 | 20 | 23 | 2 | -57.803  | 3.808981E+01 | ; |
| 1164 | H22-C17-C20-H23, DRIH method |    |    |    |   |          |              |   |
| 1165 | 22                           | 17 | 20 | 24 | 2 | 62.458   | 3.989391E+01 | ; |
| 1166 | H22-C17-C20-H24, DRIH method |    |    |    |   |          |              |   |
| 1167 | 22                           | 17 | 20 | 25 | 2 | -178.064 | 3.764286E+01 | ; |
| 1168 | H22-C17-C20-H25, DRIH method |    |    |    |   |          |              |   |
| 1169 |                              |    |    |    |   |          |              |   |

---

```

1170  SPC/E.itp
1171  [ moleculetype ]
1172  ; molnamenrexcl
1173  SOL      2
1174
1175  [ atoms ]
1176  ; nr  type  resnr residue  atom  cgnr  charge  mass
1177  1    OWSPCE  1    SOL    OW      1    -0.8476
1178  2    HWSPCE  1    SOL    HW1     1    0.4238
1179  3    HWSPCE  1    SOL    HW2     1    0.4238
1180
1181  #ifndef FLEXIBLE
1182  [ settles ]
1183  ; OW funct  doh dhh
1184  1 1  0.1 0.16330
1185
1186  [ exclusions ]
1187  1 2  3
1188  2 1  3
1189  3 1  2

```

---

```
1190  #else
1191  [ bonds ]
1192  ; i j  funct  length  force.c.
1193  1 2  1  0.1 345000  0.1  345000
1194  1 3  1  0.1 345000  0.1  345000
1195
1196  [ angles ]
1197  ; i j  k  funct  angle  force.c.
1198  2 1  3  1  109.47  383 109.47  383
1199  #endif
```
